# Supplementary material
Source: PubMed Central journal article supplement (PMC4687456)
Supplement: NIHMS744263-supplement-Jiang_Supplemental_Materials.pdf [file NIHMS744263-supplement-Jiang_Supplemental_Materials.pdf]

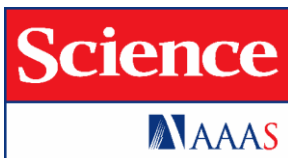

## Supplementary Materials for

### **Structure of *Tetrahymena* telomerase reveals previously unknown subunits, functions, and interactions**

Jiansen Jiang, Henry Chan, Darian D. Cash, Edward J. Miracco, Rachel R. Ogorzalek Loo, Heather E. Upton, Duilio Cascio, Reid O'Brien Johnson, Kathleen Collins, Joseph A. Loo, Z. Hong Zhou, Juli Feigon\*

\*Corresponding author. E-mail: feigon@mbi.ucla.edu

Published 15 October 2015 on *Science Express*  
DOI: 10.1126/science.aab4070

**This PDF file includes:**

Figs. S1 to S10  
Tables S1 to S4  
Full Reference List

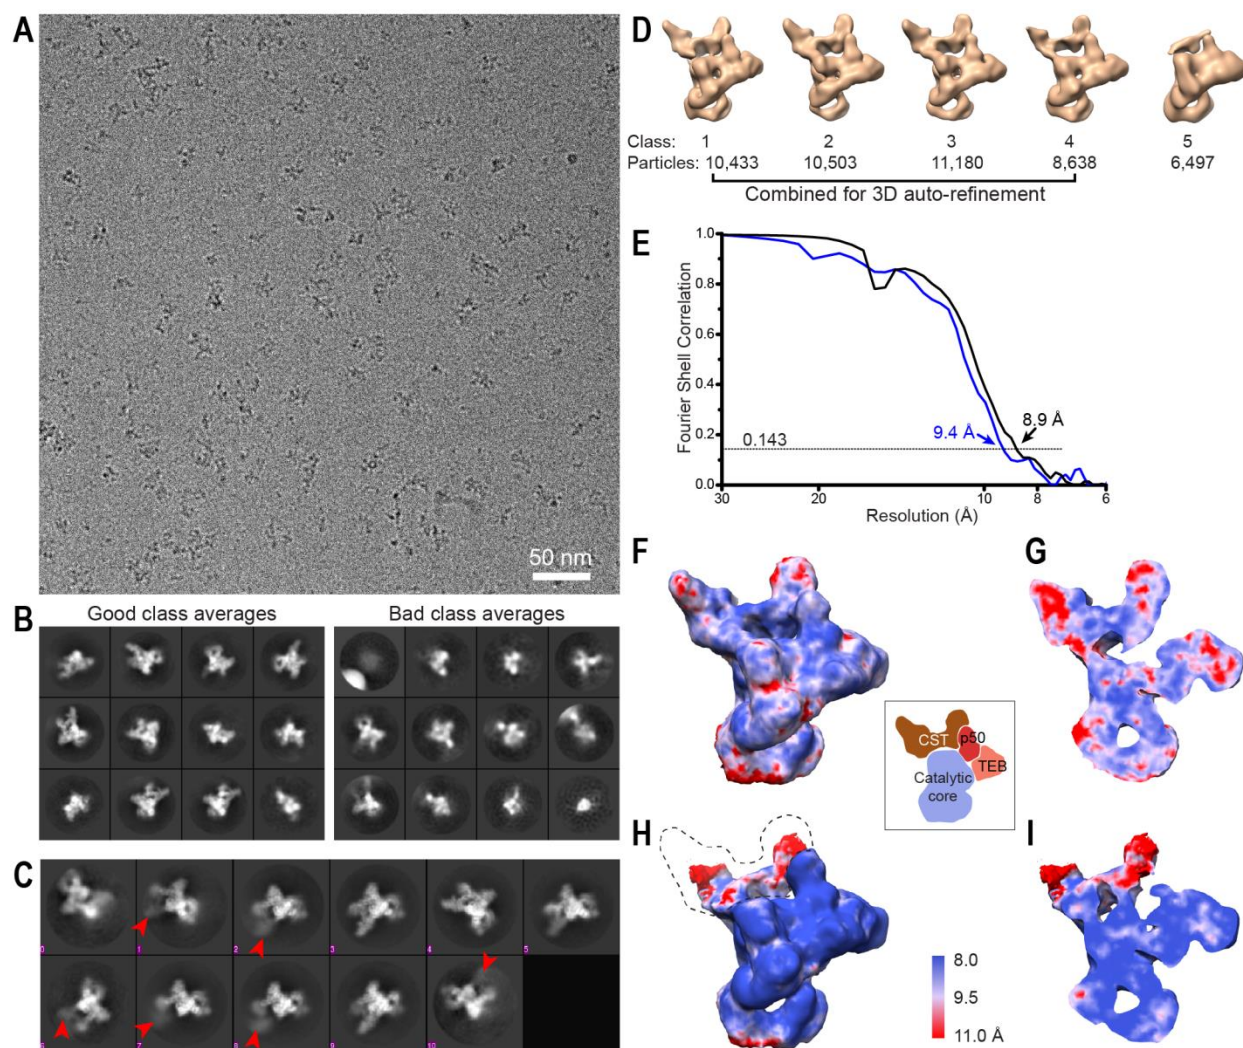

**Fig. S1. Cryo-EM of *Tetrahymena* telomerase holoenzyme and resolution estimation.** (A) A full-size (3710 × 3710 pixels) drift-corrected cryo-EM micrograph of *Tetrahymena* telomerase holoenzyme acquired at -4.9 μm defocus. (B) Representative cryo-EM 2D class averages of particles that are assessed as 'good' (left) or 'bad' (right) classes by visual inspection during data processing. (C) Cryo-EM 2D class averages of front-view particles. Red arrowheads depict the missing or fuzzy density of the flexible p75-p45-p19 subcomplex. The side length of each image box in (B) and (C) is 35 nm. (D) Cryo-EM 3D reconstructions generated by 3D classification. The density for p75-p45-p19 is missing in class 5 due to its flexibility. The particles sorted to the classes (1-4) that show an intact holoenzyme structure were combined together for the 3D auto-refinement. (E) 'Gold standard' FSC curves between two independently refined maps from the 3D auto-refinement that were carried out with a spherical mask including all subunits (blue) or with a soft-edge mask excluding p75-p45-p19 subcomplex (black). Each FSC curve was calculated with an auto-mask that was corrected by phase randomization. The resolutions were estimated at the 0.143 criterion. (F-I) Surface views (F, H) and cut-through views (G, I) of the unsharpened cryo-EM maps refined with a spherical mask (F, G) and with a soft-edge mask excluding the p75-p45-p19 subcomplex (H, I). The cryo-EM maps are colored by local

resolution estimated by ResMap using two cryo-EM maps independently refined from halves of data. The region corresponding to the masked p75-p45-p19 is depicted by the dashed line in (H). The inset is the schematic of the subcomplex organization shown in the same view as the local resolution maps.

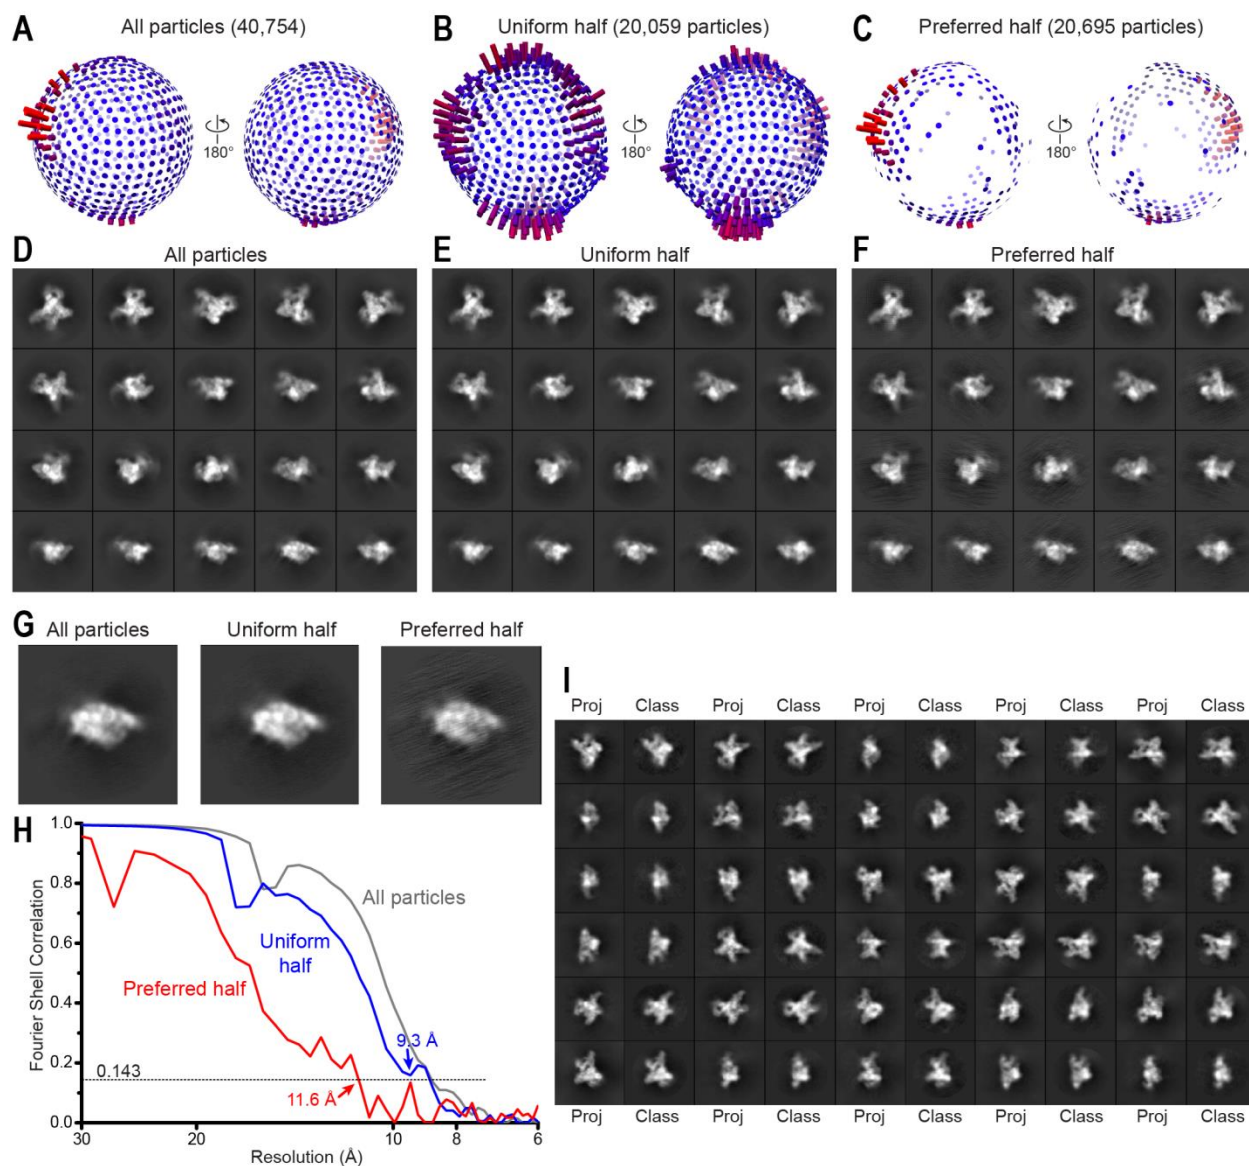

**Fig. S2. Assessment of orientation distribution of *Tetrahymena* telomerase holoenzyme particles and its impact on reconstruction resolution.** (A-C) Euler angle distributions, generated by RELION 3D auto-refinement, of all particles (A) used in the 8.9-Å reconstruction, the half of all particles that are more uniformly distributed (‘uniform half’) (B), and the other half that show strongly preferred orientation (‘preferred half’) (C). Note the histograms show relative particle counts at different orientations within each data set and are not comparable across data sets for absolute particle counts. The 3D auto-refinements of three data sets were all carried out with a soft-edge mask excluding p75-p45-p19 subcomplex using the same parameters in RELION. (D-F) Projections (30° interval) of the unfiltered 3D reconstructions from all particles, the ‘uniform half’, and the ‘preferred half’. Some projections from the ‘preferred half’ (F) show striped artifacts resulting from missing information; the projections from all particles (D) and the ‘uniform half’ (E) are isotropic without the artifacts, indicating that the quality of reconstruction from all particles or the ‘uniform half’ was not degraded by the problem of preferred orientation existing in the ‘preferred half’. (G) Close-up view of representative

projections that show striped artifacts from the ‘preferred half’ but not from all particles or the ‘uniform half’. **(H)** ‘Gold standard’ FSC curves of the refinements using all particles (grey), the ‘uniform half’ (blue), and the ‘preferred half’ (red). **(I)** Comparison of representative projections (‘Proj’) from the 9.4-Å cryo-EM map and the corresponding class averages (‘Class’). The side length of each image box in (D-G and I) is 35 nm.

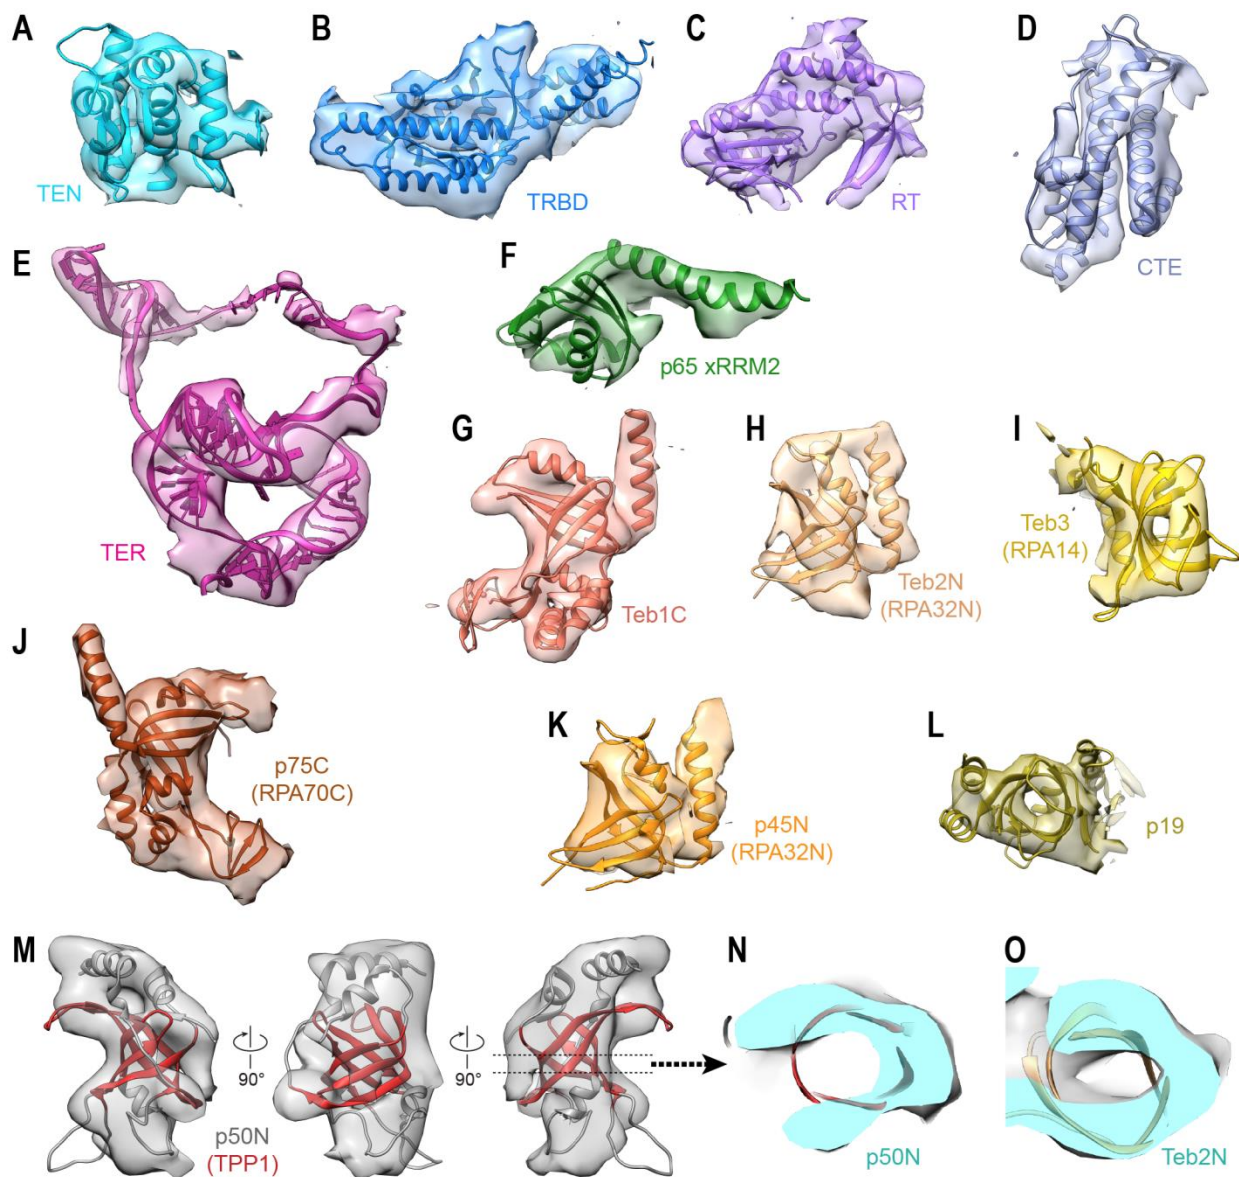

**Fig. S3. Fitting of atomic structures or homology models in the cryo-EM maps.** (A-M) Fitting of TERT (A) TEN, (B) TRBD, (C) homology model of RT and (D) homology model of CTE, (E) TER, (F) p65 xRRM2, (G) Teb1C, (H) RPA32N for Teb2N, (I) RPA14 for Teb3, (J) RPA70C for p75C, (K) RPA32N for p45N, and (L) p19, (M) TPP1 for p50N. Three views are shown to illustrate good fit of OB-fold  $\beta$ -barrel (red); loops and helices are in gray. (N, O) Horizontal cross section through density of (N) p50N and (O) Teb2N to show the hole in the density corresponding to the center of the OB-fold  $\beta$ -barrel. The atomic or homology models used in the fitting are summarized in table S1. Atomic or homology models are shown as ribbons and cryo-EM maps are shown as transparent surfaces. 8.9-Å and 9.4-Å cryo-EM maps are used in (A-I, M-O) and (J-L), respectively.

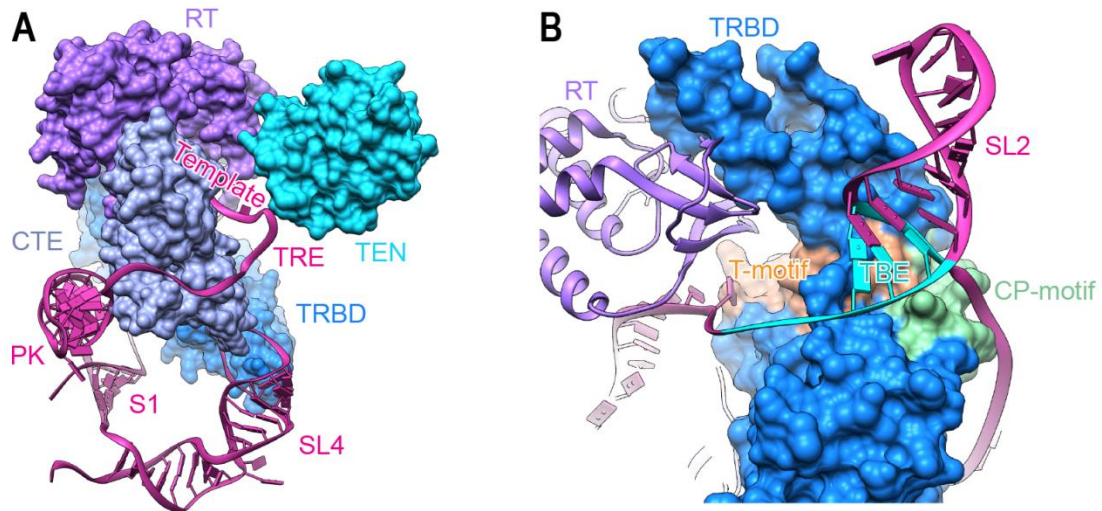

**Fig. S4. Model of the TERT-TER complex.** (A) Front view of TERT-TER complex illustrating the positions of the PK and template on opposite sides of TERT ring, the TEN domain, and the TRE between the TERT ring and TEN domain, with possible contact to TEN. (B) Close-up view of the interaction between TER SL2/TBE and TERT TRBD illustrating the location of TBE single-strand nts on either side of TERT ring near CP motif. The T and CP motif of TRBD and TER TBE are colored in brown, green, and cyan, respectively.

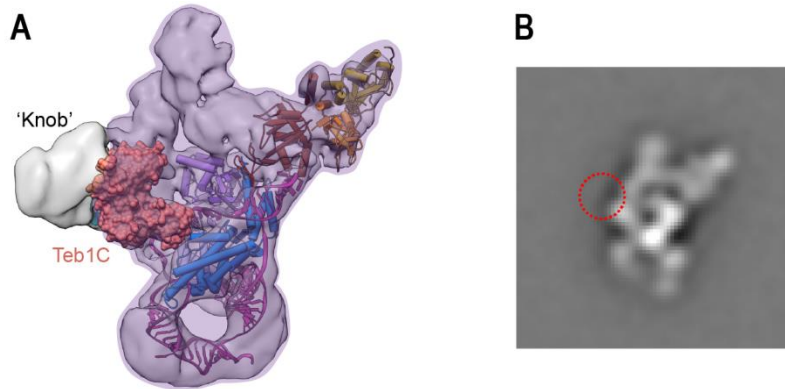

**Fig. S5. The cryo-EM density of the newly discovered proteins Teb2 and Teb3.** (A) “Back view” of the 9.4-Å cryo-EM map fit with known structures (ribbons and space-fill model). The cryo-EM density assigned to previously known subunits is superimposed with a shade of purple. Based on exhaustive fitting of available atomic models and visual inspection, the “knob” density does not correspond to any previously identified subunits. (B) Negative-stain EM class average of p50-F telomerase. Sample preparation, data acquisition, and processing have been described previously (29). Red dashed circle marks the location of the missing “knob” density. The side length of the image box is 35 nm.



### A. RPA32N-OB aligned with Teb2N-OB

|                       |                                                                                                                                                                                                                                                                                                          |
|-----------------------|----------------------------------------------------------------------------------------------------------------------------------------------------------------------------------------------------------------------------------------------------------------------------------------------------------|
| Human RPA32Nss        | ----- <b>EEE</b> ----- <b>HHHHHHH</b> ----- <b>EE</b> <b>EE</b> ----- <b>EEEEEEEEEE</b> <b>E</b> ----- <b>EEEEEE</b> ----- <b>EEEE</b> -----                                                                                                                                                             |
| <i>T. therm</i> Teb2N | 25 -----EKIPQITVPLNCFM <b>INQIVKA</b> AKENPQAHS <b>GNHYE</b> WYGAF <b>ENAIITAK</b> EF <b>ETQS</b> TN-----DSP <b>KIM</b> KG <b>LS</b> DS <b>FG</b> CIEVVI 101                                                                                                                                             |
| <i>H. sapien</i>      | 37 -----KKSRA <b>RACHIV</b> FC-----TIS <b>OLL</b> SATL-----VDE <b>VFR</b> IGNVE-----ISO <b>VTV</b> GI <b>IRHA</b> -EKAP <b>TN</b> IVY <b>KID</b> DM <b>TA</b> AP <b>MD</b> VR 106                                                                                                                        |
| <i>S. pombe</i>       | 46 -----AGN <b>KL</b> RFV-----TI <b>KOIL</b> NASQ-----VH- <b>ADAE</b> FKID <b>GV</b> -----VG <b>Q</b> TV <b>FV</b> GV <b>LR</b> NI-HAQ <b>T</b> NT <b>TY</b> Q <b>IED</b> GC-MIE <b>VR</b> 111                                                                                                           |
| <i>A. thaliana</i>    | 26 <b>AYESS</b> S <b>STAK</b> NR <b>DF</b> Q <b>GLV</b> FV-----TV <b>KOIT</b> EC <b>FP</b> -----SS <b>GE</b> NS <b>GLV</b> INGIS-----LT <b>NV</b> SL <b>GLV</b> CD <b>KD</b> ES <b>KV</b> EV <b>RF</b> LD <b>DD</b> GC <b>RG</b> -RID <b>CR</b> 105                                                      |
| <i>X. laevis</i>      | 39 -----EK <b>KS</b> RS <b>RS</b> Q <b>Q</b> IV <b>FC</b> -----TV <b>S</b> QL <b>L</b> SA <b>TQ</b> -----N <b>DE</b> V <b>FR</b> IG <b>EA</b> -----LS <b>Q</b> VT <b>IV</b> GI <b>VR</b> HA-EKAP <b>TN</b> IL <b>Y</b> VD <b>DM</b> TA <b>AP</b> MD <b>VR</b> 109                                        |
| Human RPA32Nss        | <b>E</b> ----- <b>EEEEEEEEEE</b> ----- <b>EEEEEE</b> ----- <b>HHHHHHHHHHHHHHHH</b> -----                                                                                                                                                                                                                 |
| <i>T. therm</i> Teb2N | 102 KSKMS <b>DEL</b> PE <b>FV</b> Q <b>YE</b> IEL <b>Q</b> NN <b>GR</b> H <b>YV</b> RAM <b>L</b> -----K <b>VR</b> KA <b>Q</b> IL <b>LY</b> ST <b>VD</b> AN <b>ET</b> SR <b>GL</b> DL <b>CL</b> R <b>YL</b> OR <b>H</b> G <b>IE</b> DFM-HMT-- 181                                                         |
| <i>H. sapien</i>      | 107 WWD <b>T</b> - <b>DD</b> -----T <b>SE</b> NT <b>VV</b> -----P <b>PE</b> TY <b>V</b> Y <b>V</b> AG <b>H</b> LR <b>SE</b> Q <b>N</b> K <b>S</b> V <b>AF</b> K <b>IM</b> PE <b>DM</b> NE <b>FT</b> H <b>LE</b> V <b>IN</b> A <b>M</b> V <b>L</b> S <b>K</b> AN <b>S</b> Q <b>S</b> ----- 177            |
| <i>S. pombe</i>       | 112 WE <b>H</b> I- <b>DA</b> -----L <b>SE</b> -----L- <b>AT</b> D <b>Y</b> V <b>Y</b> V <b>GN</b> I <b>K</b> IS <b>SG</b> K <b>IY</b> AS <b>QY</b> IR <b>T</b> K <b>DH</b> NE <b>HF</b> H <b>LE</b> PA <b>TA</b> V <b>L</b> H <b>FP</b> Q <b>K</b> AN <b>A</b> ----- 176                                 |
| <i>A. thaliana</i>    | 106 WV <b>SE</b> - <b>DF</b> -----D <b>RE</b> ME <b>S</b> V-----R <b>DC</b> TY <b>V</b> RL <b>S</b> GH <b>L</b> TE <b>GG</b> T <b>OL</b> V <b>F</b> S <b>VR</b> IM <b>DF</b> NE <b>VT</b> FB <b>Y</b> TE <b>CI</b> H <b>F</b> Y <b>S</b> Q <b>NS</b> ES <b>Q</b> R <b>Q</b> Q <b>VD</b> T <b>Q</b> S 182 |
| <i>X. laevis</i>      | 110 WWD <b>T</b> - <b>DE</b> -----A <b>SC</b> EN <b>M</b> V <b>V</b> -----P <b>PG</b> S <b>V</b> Y <b>V</b> AG <b>H</b> LR <b>SE</b> Q <b>N</b> K <b>S</b> V <b>AF</b> K <b>I</b> AP <b>VD</b> NE <b>V</b> S <b>HL</b> EV <b>V</b> HA <b>M</b> AM <b>S</b> Q <b>G</b> AP <b>S</b> GG <b>G</b> ----- 182  |

### B. RPA32-WH aligned with Teb2-WH

|                        |                                                                                                                                                                                                                                                                                                            |
|------------------------|------------------------------------------------------------------------------------------------------------------------------------------------------------------------------------------------------------------------------------------------------------------------------------------------------------|
| Human RPA32WHss        | ----- <b>HHHHHHHHHH</b> ----- <b>EE</b> <b>HHHHHHH</b> ----- <b>HHHHHHHHHHHHHHHH</b> ----- <b>EEE</b> ----- <b>EEEE</b> -----                                                                                                                                                                              |
| <i>T. therm</i> Teb2WH | 202 -----RN <b>Q</b> Q <b>P</b> Q <b>EV</b> LE <b>EM</b> Q <b>IL</b> K <b>HN</b> P <b>ND</b> IP <b>KS</b> K <b>TI</b> EF <b>Q</b> S <b>Q</b> L <b>N</b> Q <b>V</b> Q <b>IL</b> Q <b>IL</b> Q <b>IV</b> SA <b>NE</b> IF <b>S</b> GV <b>S</b> DN <b>LL</b> N <b>V</b> ----- 269                              |
| <i>H. sapien</i>       | 202 -----AN <b>GL</b> TV <b>A</b> Q <b>N</b> Q <b>VL</b> IK-----AC <b>PR</b> P- <b>EG</b> IN <b>F</b> Q <b>DL</b> K <b>N</b> Q <b>K</b> -H <b>MS</b> V <b>S</b> S <b>K</b> Q <b>A</b> VD <b>F</b> IS <b>NE</b> GH <b>IY</b> S <b>V</b> DD <b>D</b> H <b>FK</b> S <b>DAE</b> ----- 270                      |
| <i>S. pombe</i>        | 211 -----E <b>Y</b> SL <b>T</b> PA <b>Q</b> TV <b>M</b> Q <b>AI</b> H-----S <b>AP</b> ET <b>EG</b> V <b>H</b> VR <b>Q</b> LA <b>S</b> Y <b>G</b> -----P <b>G</b> ID <b>I</b> T <b>AV</b> D <b>T</b> Q <b>Q</b> E <b>GI</b> I <b>Y</b> T <b>ID</b> EN <b>H</b> FK <b>S</b> VL <b>Q</b> D <b>Q</b> ----- 279 |
| <i>A. thaliana</i>     | 200 NP <b>V</b> SS <b>Q</b> ND <b>G</b> NG <b>R</b> KN <b>L</b> DM <b>LD</b> Y <b>H</b> Q <b>P</b> ACT <b>AR</b> Q <b>Q</b> GH <b>IE</b> HA <b>Q</b> L <b>K</b> -----I <b>P</b> KN <b>K</b> EG <b>V</b> Q <b>S</b> EG <b>D</b> GL <b>IY</b> ST <b>ID</b> E <b>H</b> FK <b>H</b> VEL----- 279               |
| <i>X. laevis</i>       | 207 -----PT <b>NG</b> L <b>T</b> PH <b>Q</b> S <b>Q</b> IL <b>SL</b> IK-----S <b>C</b> -K <b>G</b> NE <b>G</b> AF <b>EL</b> K <b>NR</b> H-G <b>M</b> V <b>N</b> T <b>IR</b> Q <b>AV</b> EF <b>I</b> S <b>NE</b> GH <b>IY</b> ST <b>ID</b> E <b>H</b> Y <b>K</b> CT <b>D</b> GD----- 276                    |

### C. RPA14 aligned with Teb3

|                      |                                                                                                                                                                                                                                                                                                                                               |
|----------------------|-----------------------------------------------------------------------------------------------------------------------------------------------------------------------------------------------------------------------------------------------------------------------------------------------------------------------------------------------|
| Human RPA14ss        | ----- <b>EEE</b> <b>HHHHH</b> ----- <b>EEEEEEEEEE</b> ----- <b>EEEE</b> ----- <b>EEEE</b> ----- <b>EEEEEE</b> ----- <b>EEEEEE</b> -----                                                                                                                                                                                                       |
| <i>T. therm</i> Teb3 | 1 MD <b>AE</b> Q <b>Q</b> CV <b>MY</b> PR <b>IL</b> F <b>EQ</b> MA <b>CF</b> R <b>G</b> K <b>K</b> V <b>TV</b> GV <b>NC</b> NE <b>Q</b> ND <b>S</b> LV <b>IE</b> F <b>GP</b> T <b>GL</b> NO <b>H</b> V <b>VD</b> N <b>Y</b> RR <b>VD</b> L <b>NT</b> TF <b>VE</b> IR <b>G</b> V <b>VL</b> N <b>Q</b> IV <b>S</b> CE <b>EL</b> TE <b>FE</b> 92 |
| <i>H. sapien</i>     | 1 - <b>M</b> VD <b>M</b> DL <b>PR</b> SR <b>IN</b> AG <b>MA</b> AC <b>FI</b> D <b>PK</b> CF <b>VG</b> LE <b>K</b> IP <b>PT</b> GM <b>FI</b> LS <b>D</b> GE <b>K</b> NG <b>TE</b> ME <b>PL</b> -----D <b>DE</b> IS <b>CI</b> EV <b>EV</b> GV <b>RT</b> AK <b>AT</b> IL <b>CT</b> S <b>Y</b> Q <b>FK</b> 88                                     |
| <i>S. pombe</i>      | 1 ----- <b>M</b> RP <b>T</b> PR <b>V</b> K <b>DM</b> PE <b>CS</b> SK <b>T</b> VR <b>IG</b> AN <b>V</b> Q <b>GE</b> T <b>AR</b> K <b>VD</b> S <b>NG</b> S-----F <b>DM</b> HT <b>VD</b> N <b>T</b> L-----E <b>PN</b> H <b>F</b> Y <b>E</b> F <b>V</b> SV <b>K</b> PD <b>S</b> SV <b>QL</b> TC <b>VD</b> ----- 78                                |
| <i>A. thaliana</i>   | 1 M <b>D</b> T----- <b>S</b> PS <b>A</b> F <b>V</b> NG <b>AL</b> IR <b>FI</b> G <b>Q</b> K <b>VRT</b> IV <b>VT</b> GS <b>IG</b> SV-----V <b>G</b> K <b>S</b> T <b>D</b> L <b>Q</b> IV <b>RG</b> SS-----P <b>PS</b> PL <b>TY</b> EV <b>IG</b> IA <b>ES</b> DN <b>A</b> RA <b>ET</b> T <b>W</b> --N 81                                          |
| <i>X. laevis</i>     | 1 - <b>M</b> AD <b>M</b> PE <b>ASK</b> VR <b>INS</b> SM <b>IA</b> CV <b>NG</b> SP <b>VC</b> F <b>Y</b> GV <b>K</b> VD <b>VE</b> PT <b>TS</b> IV <b>LS</b> D <b>G</b> AG <b>K</b> AT <b>VE</b> NE <b>PL</b> -----E <b>DE</b> IS <b>CI</b> EV <b>IG</b> K <b>V</b> TK <b>AT</b> IM <b>GS</b> Y <b>FP</b> FR 88                                  |
| Human RPA14ss        | ----- <b>HHHHHHHHHH</b> ----- <b>HHHHH</b> -----                                                                                                                                                                                                                                                                                              |
| <i>T. therm</i> Teb3 | 93 - <b>Q</b> K <b>D</b> P <b>F</b> DT <b>Y</b> SK <b>L</b> I <b>H</b> TS <b>SD</b> KL <b>SS</b> L <b>F</b> TD <b>Q</b> ----- 121                                                                                                                                                                                                             |
| <i>H. sapien</i>     | 89 ED <b>S</b> HP <b>FD</b> L <b>GL</b> Y <b>NE</b> AV <b>K</b> II <b>H</b> -----D <b>EP</b> Q <b>F</b> Y <b>PL</b> G <b>IV</b> Q <b>H</b> D 121                                                                                                                                                                                              |
| <i>S. pombe</i>      | 79 - <b>F</b> GT <b>D</b> DM <b>EV</b> Y <b>Q</b> L <b>V</b> LS <b>H</b> -----K <b>Y</b> NS <b>L</b> FE----- 104                                                                                                                                                                                                                              |
| <i>A. thaliana</i>   | 82 - <b>F</b> GN <b>T</b> FD <b>T</b> Q <b>N</b> Y <b>N</b> EL <b>K</b> LA <b>NG</b> - <b>EE</b> K <b>HL</b> FI----- 107                                                                                                                                                                                                                      |
| <i>X. laevis</i>     | 89 DD <b>V</b> ST <b>DL</b> AL <b>Y</b> DE <b>AL</b> K <b>II</b> H-----E <b>EP</b> Q <b>Y</b> Y <b>PF</b> GH <b>S</b> ANE 121                                                                                                                                                                                                                 |

### D. Stn1N-OB aligned with p45N-OB

|                      |                                                                                                                                                                                                                                                                                                                                                 |
|----------------------|-------------------------------------------------------------------------------------------------------------------------------------------------------------------------------------------------------------------------------------------------------------------------------------------------------------------------------------------------|
| Human Stn1Nss        | ----- <b>EE</b> <b>HHHHHHH</b> EE----- <b>EEE</b> ----- <b>EEE</b> ----- <b>EEEEEEEEEEEE</b> ----- <b>EE</b> ----- <b>EEEE</b> ----- <b>EEEE</b> ----- <b>EE</b> -----                                                                                                                                                                          |
| <i>T. therm</i> p45N | 1 MED <b>N</b> F <b>EL</b> V <b>FL</b> K <b>ET</b> -----P <b>SL</b> PD <b>F</b> -----SK <b>V</b> CT <b>GL</b> IT <b>S</b> FS <b>N</b> FP <b>S</b> EQ <b>N</b> Q <b>K</b> Q <b>VP</b> H <b>K</b> IA <b>I</b> Q <b>D</b> ST <b>GE</b> AE <b>L</b> FL <b>DM</b> K <b>FC</b> Q <b>EE</b> IS <b>V</b> FK 77                                          |
| <i>H. sapien</i>     | 24 -----L <b>A</b> FA <b>K</b> Y <b>IR</b> D <b>IL</b> DM <b>K</b> ES <b>R</b> Q <b>VP</b> G-V <b>FL</b> Y <b>NG</b> H <b>PI</b> K <b>Q</b> VD <b>VL</b> GT <b>V</b> GV <b>R</b> ER <b>DA</b> F <b>Y</b> -----S <b>Y</b> GV <b>DD</b> ST <b>G</b> V <b>IN</b> CI-- <b>CK</b> -K <b>L</b> NT <b>ES</b> V <b>SA</b> 99                            |
| <i>S. pombe</i>      | 16 ----- <b>S</b> RR <b>NP</b> ME <b>IS</b> D <b>V</b> H <b>K</b> IS <b>F</b> PH <b>L</b> Q <b>RY</b> IG <b>F</b> WM <b>GF</b> PI <b>R</b> IM <b>Q</b> LV <b>GI</b> IA <b>AI</b> DI <b>Y</b> E <b>G</b> K <b>H</b> -----V <b>L</b> TV <b>DD</b> CS <b>G</b> M <b>VL</b> RV-- <b>V</b> GI-L <b>Q</b> DD <b>F</b> ----- 88                        |
| <i>A. thaliana</i>   | 5 L <b>Q</b> ST <b>H</b> AK <b>L</b> V <b>ARD</b> I <b>Q</b> RL <b>T</b> Q <b>S</b> PT <b>ES</b> NS <b>S</b> FL <b>L</b> GG <b>AC</b> VS <b>R</b> VE <b>IV</b> GT <b>IV</b> SR <b>DL</b> TP <b>K</b> FL-----K <b>F</b> GV <b>DD</b> CG <b>TC</b> V <b>TC</b> V-- <b>M</b> L-L <b>Q</b> LT <b>S</b> Y <b>S</b> 83                                |
| <i>X. laevis</i>     | 19 V <b>L</b> FA <b>FA</b> K <b>L</b> Y <b>K</b> ID <b>L</b> EL <b>SE</b> S <b>K</b> Q <b>VP</b> G-I <b>FF</b> Y <b>K</b> GH <b>PI</b> K <b>Q</b> VD <b>LL</b> GT <b>VV</b> F <b>RE</b> KE <b>NY</b> -----S <b>Y</b> GV <b>DD</b> ST <b>G</b> V <b>IS</b> CT-- <b>CK</b> -S <b>T</b> AQ <b>TE</b> SV <b>N</b> 96                                |
| Human Stn1Nss        | ----- <b>HHHHHHH</b> ----- <b>EEEEEEEEEE</b> ----- <b>EEEEEEEEEE</b> ----- <b>HHHHHHHHHHHHHHHH</b> -----                                                                                                                                                                                                                                        |
| <i>T. therm</i> p45N | 78 AIT <b>G</b> I-----G <b>V</b> L <b>R</b> KK <b>N</b> IG <b>A</b> Q <b>VC</b> K-----I <b>IV</b> ER <b>F</b> RI <b>HS</b> AD <b>E</b> EM <b>L</b> -- <b>Q</b> YL-- <b>L</b> -- <b>I</b> Q <b>R</b> KL <b>SK</b> ----- 126                                                                                                                      |
| <i>H. sapien</i>     | 100 APS <b>A</b> ARE <b>LS</b> -----L <b>T</b> S <b>Q</b> L <b>KL</b> Q <b>ET</b> IE <b>Q</b> KT <b>RI</b> E <b>IG</b> D <b>T</b> IR <b>VR</b> GS <b>IR</b> TY <b>RE</b> RE <b>H</b> AT <b>TY</b> K <b>Y</b> VD <b>P</b> V <b>NI</b> Q <b>I</b> AR <b>M</b> LE <b>L</b> PT <b>Y</b> IR <b>K</b> V <b>MD</b> Q <b>P</b> ----- 181                |
| <i>S. pombe</i>      | 89 ----- <b>S</b> MS <b>K</b> RA <b>IS</b> SP <b>Q</b> CV <b>NC</b> V <b>CV</b> FG <b>K</b> INS <b>F</b> RE <b>VE</b> LD <b>AS</b> FE <b>EL</b> R <b>DN</b> PE <b>D</b> W <b>K</b> -- <b>AW</b> Q <b>K</b> RM----- <b>Y</b> KN <b>L</b> TK <b>IS</b> 150                                                                                        |
| <i>A. thaliana</i>   | 84 R <b>WD</b> PA-----T <b>ILL</b> LA <b>S</b> A <b>AR</b> K <b>Q</b> AA <b>IR</b> IC <b>AV</b> AR <b>VR</b> GR <b>VS</b> Y <b>R</b> GM <b>Q</b> TA <b>N</b> V <b>VA</b> ER <b>DP</b> NA <b>EL</b> -- <b>H</b> W <b>LE</b> CL <b>K</b> L <b>G</b> Q <b>S</b> CR <b>VR</b> I <b>Q</b> S----- 160                                                 |
| <i>X. laevis</i>     | 97 Q <b>ET</b> A <b>ARR</b> IP <b>SS</b> SK <b>LD</b> AI <b>M</b> K <b>E</b> Y <b>KE</b> N <b>K</b> K <b>AK</b> MD <b>IG</b> DI <b>IR</b> VR <b>GS</b> IK <b>V</b> FR <b>EQ</b> RE <b>IV</b> AS <b>V</b> Y <b>K</b> VE <b>DP</b> TL <b>I</b> Q <b>M</b> AR <b>ML</b> D <b>L</b> PY <b>M</b> Y <b>R</b> NV <b>RD</b> K <b>FP</b> AI <b>D</b> 188 |

### E. Stn1-WH1 aligned with p45-WH1

|                        |                                                                                                                                                                                                                                                                                                                                                                                            |
|------------------------|--------------------------------------------------------------------------------------------------------------------------------------------------------------------------------------------------------------------------------------------------------------------------------------------------------------------------------------------------------------------------------------------|
| Human Stn1WH1ss        | ----- <b>HHHHHHH</b> ----- <b>HHHHHHHHHHHH</b> ----- <b>EEEE</b> <b>HHHHH</b> ----- <b>HHHHHHHH</b> ----- <b>EE</b> <b>HHHHHHH</b> -----                                                                                                                                                                                                                                                   |
| p45WH1ss               | ----- <b>HHHHHHHHHHHHHHHHHHHHHH</b> ----- <b>EEEE</b> <b>HHHHH</b> ----- <b>HHHHHHHH</b> ----- <b>HHHHHHHHHHHH</b> -----                                                                                                                                                                                                                                                                   |
| <i>T. therm</i> p45WH1 | 177 NS <b>L</b> Y <b>K</b> EL <b>I</b> AG <b>E</b> L <b>MR</b> ITH <b>KL</b> L <b>I</b> Q <b>L</b> Q <b>Q</b> Q <b>P</b> AN <b>N</b> K <b>Q</b> IN <b>EM</b> D <b>V</b> ES <b>N</b> E <b>L</b> A <b>E</b> KE <b>V</b> I <b>IK</b> Q <b>E</b> IA <b>K</b> D <b>Q</b> L <b>Y</b> D <b>T</b> LS <b>I</b> Q <b>Y</b> Q <b>D</b> - <b>Q</b> KE <b>Y</b> Y <b>AK</b> IA <b>Q</b> SL <b>E</b> 267 |
| <i>H. sapien</i>       | 191 -----E <b>AL</b> SN <b>PG</b> -----A <b>LD</b> PS <b>T</b> SL <b>SE</b> K-----A <b>K</b> F <b>LM</b> EN <b>RV</b> Q <b>S</b> F <b>Y</b> Q <b>Q</b> E <b>LM</b> VE <b>V</b> 233                                                                                                                                                                                                         |
| <i>S. pombe</i>        | 165 ----- <b>F</b> PK <b>D</b> H <b>A</b> KE <b>L</b> L <b>K</b> -----I <b>R</b> - <b>Q</b> M <b>K</b> L <b>N</b> V <b>Q</b> A-----G <b>FT</b> IE <b>E</b> I <b>I</b> Y <b>K</b> A <b>K</b> -----E <b>L</b> H <b>L</b> PL <b>V</b> H <b>FN</b> V <b>ENE</b> ----- <b>IV</b> E 219                                                                                                          |
| <i>S. cerevisiae</i>   | 312 -----R <b>T</b> S <b>A</b> KS <b>N</b> L <b>M</b> L-----I <b>LL</b> GL- <b>Q</b> M <b>K</b> E <b>I</b> SN <b>SD</b> -----L <b>Y</b> L <b>K</b> E <b>V</b> RS <b>V</b> TS-----L <b>AS</b> FL----- <b>F</b> Q <b>Q</b> Q <b>N</b> V <b>VM</b> K 363                                                                                                                                      |
| <i>X. laevis</i>       | 200 -----M <b>V</b> T <b>Q</b> A <b>H</b> IT <b>Q</b> SE <b>K</b> ----- <b>V</b> K <b>V</b> FL <b>M</b> EN <b>K</b> I <b>H</b> FN <b>Q</b> RE <b>LS</b> V <b>D</b> 237                                                                                                                                                                                                                     |
| Human Stn1WH1ss        | <b>HHHHHHHHHH</b> ----- <b>HHHHHHHHHHHHHHHH</b> ----- <b>EEE</b> ----- <b>EEE</b> -----                                                                                                                                                                                                                                                                                                    |
| p45WH1ss               | <b>HHHHH</b> ----- <b>EEE</b> ----- <b>EE</b> ----- <b>EEEEEE</b> -----                                                                                                                                                                                                                                                                                                                    |
| <i>T. therm</i> p45WH1 | 268 DF <b>V</b> S <b>I</b> S <b>AL</b> K <b>M</b> -----V <b>S</b> Y <b>I</b> Y <b>PN</b> -----I <b>S</b> Y <b>Q</b> V <b>S</b> ----- 290                                                                                                                                                                                                                                                   |
| <i>H. sapien</i>       | 234 S <b>LL</b> SL <b>AN</b> Q <b>P</b> VI <b>HS</b> AS <b>S</b> D <b>Q</b> V <b>N</b> FK <b>Q</b> DT <b>TS</b> K <b>AI</b> HS <b>I</b> FK <b>NA</b> I <b>QL</b> L <b>Q</b> E <b>K</b> L <b>IF</b> Q <b>DD</b> GD <b>FN</b> L <b>Y</b> V <b>TR</b> -- 295                                                                                                                                  |
| <i>S. pombe</i>        | 220 N <b>CD</b> C----- <b>N</b> H <b>I</b> -L <b>AL</b> NS <b>L</b> Q <b>TL</b> L <b>Q</b> R <b>VR</b> RS <b>NS</b> -----V <b>Y</b> ML <b>V</b> TS <b>K</b> 256                                                                                                                                                                                                                            |
| <i>S. cerevisiae</i>   | 364 S <b>F</b> DS <b>L</b> -----E <b>KE</b> AF <b>R</b> DL <b>V</b> NR <b>LV</b> S <b>Q</b> GL <b>GL</b> D <b>K</b> T <b>SET</b> FD----- 397                                                                                                                                                                                                                                               |
| <i>X. laevis</i>       | 238 S <b>L</b> I <b>T</b> ASS <b>P</b> VS <b>D</b> SK <b>A</b> -----E <b>PK</b> D <b>S</b> SS <b>S</b> K <b>I</b> H <b>NI</b> F <b>KE</b> AI <b>K</b> V <b>L</b> LE <b>CG</b> Y <b>F</b> Q <b>G</b> PN <b>Q</b> E-V <b>Y</b> Q <b>V</b> T <b>D</b> Q 296                                                                                                                                   |

### F. Stn1-WH2 aligned with p45-WH2

|                        |                                                                                                                                                                                                                                                                                                                                                                                            |
|------------------------|--------------------------------------------------------------------------------------------------------------------------------------------------------------------------------------------------------------------------------------------------------------------------------------------------------------------------------------------------------------------------------------------|
| Human Stn1WH2ss        | <b>HHH</b> ----- <b>HHHHHHHHHH</b> ----- <b>EEEE</b> <b>HHHHHHHH</b> ----- <b>HHH</b> ----- <b>HHH</b> ----- <b>HH</b> ----- <b>HHH</b> -----                                                                                                                                                                                                                                              |
| p45WH2ss               | <b>HHHHHHHHHHHHHHHHHHHH</b> ----- <b>EEEE</b> <b>HHHHHHH</b> ----- <b>HHH</b> ----- <b>HHHHHHHHHHHH</b> ----- <b>EEEE</b> -----                                                                                                                                                                                                                                                            |
| <i>T. therm</i> p45WH2 | 291 - <b>I</b> GF <b>FO</b> N <b>ILD</b> I <b>AT</b> K <b>T</b> V <b>K</b> DR <b>G</b> -----A <b>LG</b> C <b>N</b> Y <b>K</b> Y <b>DK</b> L-----T <b>KA</b> N <b>L</b> Q <b>IS</b> Y <b>PL</b> IS <b>YS</b> I <b>S</b> Y <b>L</b> V <b>HL</b> F <b>Q</b> D <b>FN</b> I <b>E</b> I <b>E</b> 357                                                                                             |
| <i>H. sapien</i>       | 297 ----- <b>D</b> K <b>Q</b> -----L <b>HR</b> K <b>I</b> H <b>R</b> I <b>IQ</b> D <b>C</b> Q <b>K</b> ----- <b>P</b> N <b>H</b> ME----- <b>K</b> - <b>G</b> CH <b>F</b> L <b>H</b> L <b>AC</b> AR <b>LS</b> -I <b>RP</b> G <b>SE</b> ----- <b>A</b> V <b>L</b> Q <b>Q</b> ----- <b>V</b> I-E----- <b>L</b> E <b>D</b> - 353                                                               |
| <i>S. pombe</i>        | 357 ----- <b>D</b> I <b>IR</b> F <b>V</b> -----I <b>PL</b> M----- <b>A</b> S <b>GL</b> E <b>A</b> H <b>K</b> V <b>Q</b> S <b>IV</b> R <b>DS</b> N <b>PM</b> F <b>IT</b> PL <b>S</b> AI <b>A</b> K <b>H</b> IC <b>Q</b> FL <b>IR</b> T <b>K</b> G <b>K</b> W <b>R</b> Q <b>A</b> K <b>Y</b> T----- <b>W</b> V-- <b>R</b> D <b>N</b> Q <b>F</b> ----- 324                                    |
| <i>S. cerevisiae</i>   | 397 D <b>LL</b> PL <b>N</b> L <b>FE</b> Y <b>AE</b> K <b>R</b> IS <b>VL</b> M <b>K</b> L <b>Q</b> C <b>Y</b> T <b>G</b> V <b>Q</b> LS <b>H</b> V <b>Q</b> -----E <b>K</b> L <b>H</b> L <b>P</b> Y <b>IT</b> T <b>NG</b> I <b>V</b> D <b>V</b> FK <b>EC</b> K <b>R</b> T <b>K</b> Q <b>Y</b> PE <b>VL</b> AN <b>W</b> ----- <b>W</b> I-- <b>D</b> L <b>D</b> PK <b>NG</b> ME <b>D</b> Q 479 |
| <i>X. laevis</i>       | 297 ----- <b>K</b> Q-----L <b>H</b> K <b>R</b> TL <b>S</b> I <b>IQ</b> ED <b>CK</b> R----- <b>Q</b> K <b>H</b> AE----- <b>K</b> - <b>G</b> CH <b>F</b> L <b>Y</b> L <b>T</b> CV <b>R</b> Q <b>S</b> - <b>F</b> G <b>SS</b> Y <b>RE</b> ----- <b>T</b> VL <b>R</b> ----- <b>V</b> I-- <b>D</b> ----- <b>T</b> LE <b>G</b> - 352                                                             |
| Human Stn1-WH2         | <b>H</b> ----- <b>EEEE</b> ----- <b>EEEE</b> -----                                                                                                                                                                                                                                                                                                                                         |
| p45WH2ss               | ----- <b>EEEE</b> -----                                                                                                                                                                                                                                                                                                                                                                    |
| <i>T. therm</i> p45WH2 | 358 NE----- <b>H</b> K <b>F</b> Y <b>Y</b> Q <b>A</b> F <b>Q</b> Y <b>D</b> D 372                                                                                                                                                                                                                                                                                                          |
| <i>H. sapien</i>       | 354 Q <b>S</b> D <b>I</b> V <b>ST</b> ME <b>H</b> Y <b>T</b> A <b>F</b> ----- 368                                                                                                                                                                                                                                                                                                          |
| <i>S. pombe</i>        | 325 ----- <b>V</b> ----- 325                                                                                                                                                                                                                                                                                                                                                               |
| <i>S. cerevisiae</i>   | 480 N <b>S</b> G <b>ILL</b> L <b>H</b> -L <b>E</b> Y <b>A</b> A <b>A</b> Y <b>S</b> ----- 494                                                                                                                                                                                                                                                                                              |
| <i>X. laevis</i>       | 353 N <b>S</b> D <b>I</b> V <b>ST</b> ME <b>K</b> Y <b>T</b> A <b>F</b> ----- 367                                                                                                                                                                                                                                                                                                          |

### G. Ten1 aligned with p19

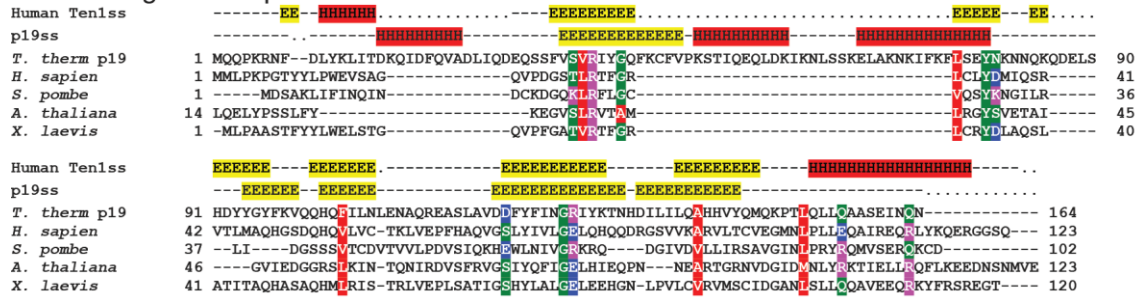

**Fig. S6. Multiple sequence alignments of TEB2/3, RPA2/3, Stn1, Ten1, p45 and p19.**

Secondary structures from the previously reported crystal structures of human proteins and crystal structures of *Tetrahymena* proteins reported here (p45C WH1/WH2 and p19) are shown as “.” for gaps, “-” for loops, “E” for beta-sheet, and “H” for alpha-helix. Conserved or similar residues are highlighted according to their chemical characteristics: hydrophobic, polar, negatively charged, positively charged. (A) RPA32N OB-fold aligned with Teb2N OB-fold. (B) RPA32 WH domain aligned with Teb2 WH domain. (C) RPA14 aligned with Teb3. (D) Stn1N OB-fold aligned with p45N OB-fold. (E) Stn1 WH1 domain aligned with p45 WH1 domain. (F) Stn1 WH2 domain aligned with p45 WH2 domain. (G) Ten1 aligned with p19. Alignments reveal close homology of Teb2/3 with RPA2/3. Consistent with previous observations of low sequence homology of Stn1 and Ten1 across kingdoms, p45 and p19 show lower sequence homology with Stn1 and Ten1 proteins. Multiple sequence alignments were performed using CLUSTAL.

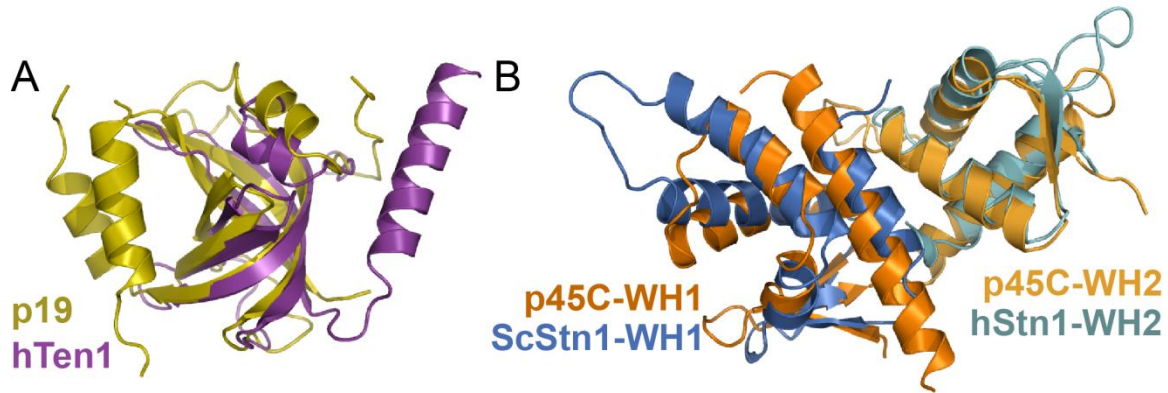

**Fig. S7. p19 and p45C are structurally similar to Ten1 and Stn1C.** (A) Structural alignment of p19 (yellow) with human Ten1 [PDB 4JOI] (purple). RMSD = 2.5Å. (B) Structural alignment of p45 WH1 (orange) and WH2 (yellow-orange) domains with *S. cerevisiae* Stn1C-WH1 [PDB 3KEY] (blue) and human Stn1C-WH2 [PDB 4JQF] (teal), respectively. RMSD = 2.8 and 1.9, respectively. Structural alignments were made using the Dali server ([http://ekhidna.biocenter.helsinki.fi/dali\\_server](http://ekhidna.biocenter.helsinki.fi/dali_server)).

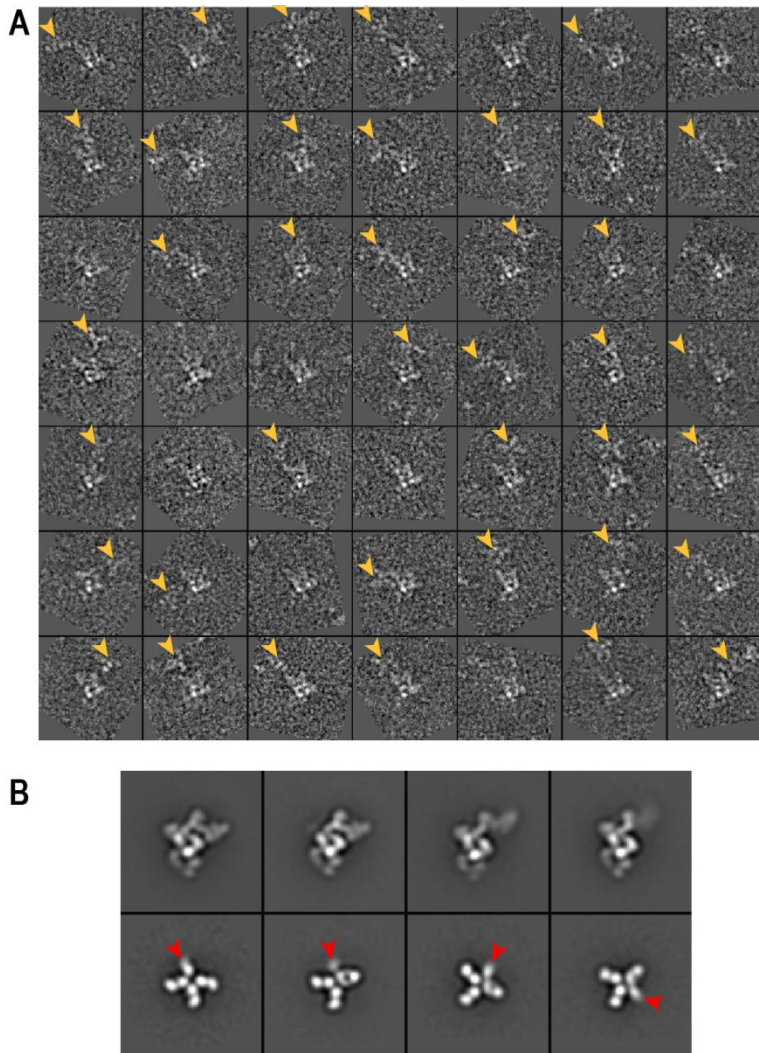

**Fig. S8. Fab-labeled p45-F telomerase holoenzyme.** (A) Randomly selected negative-stain EM particle images of telomerase holoenzyme with the C-terminus of p45-F labeled with anti-FLAG Fab. Distinguishable densities of Fab are marked with yellow arrowheads. Particles are rotated to match the orientation of telomerase holoenzyme among them for the ease of visualization. The Fab density mostly appears in the top-left corner of the image that is near the position of p45N. (B) Negative-stain EM class averages of Fab-labeled p45-F telomerase holoenzyme particles. Two families of class averages are observed: telomerase holoenzyme (first row) and 3 Fab attached to the C-terminus of p45 (second row). Red arrowheads mark the density of the C-terminal domain of p45. No class averages show these two structures together due to the flexible positioning between them, attributed to unstructured linker residues. The side length of each image box in (A) and (B) is 56 nm and 42 nm, respectively. Sample preparation, data acquisition, and processing have been described previously (29).

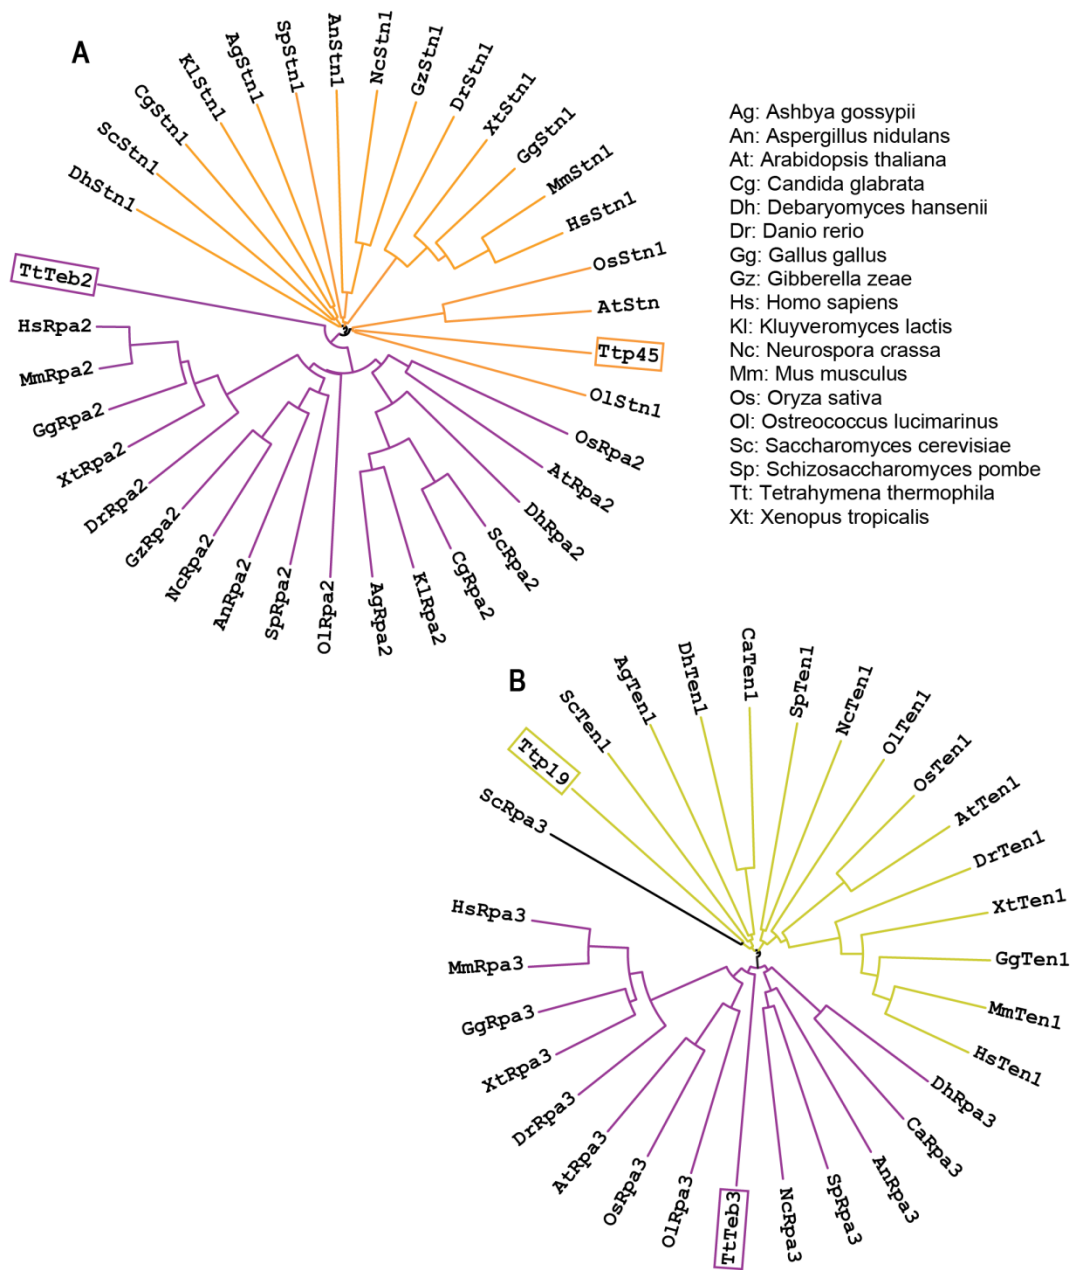

**Fig. S9. Phylogenetic cluster analysis of Stn1/Rpa2 and Ten1/Rpa3.** (A) Stn1 and Rpa2 and (B) Ten1 and Rpa3 cluster in distinct monophyletic groups. Shown is a rooted maximum likelihood phylogeny of Stn1 and Rpa2 (A) and Ten1 and Rpa3 (B) inferred using the WAG amino-acid transition model in RAxML [A. Stamatakis: "RAxML Version 8: A tool for Phylogenetic Analysis and Post-Analysis of Large Phylogenies" in *Bioinformatics*, **30**, 1312-1313, 2014] from sequence alignment generated with ClustalW2. Alignments of the two protein families were conducted simultaneously and the cluster analyses show that (A) p45 clusters with Stn1 while Teb2 clusters with Rpa2 and (B) p19 clusters with Ten1 while Teb3 clusters with Rpa3.

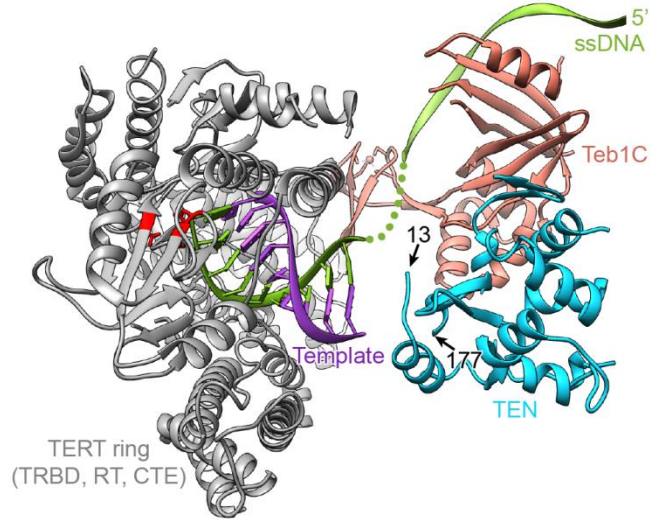

**Fig. S10. Model of ssDNA exiting the template.** Models of DNA (green) paired with the template (purple) and bound to Teb1C are based on the fitting of the crystal structures of *Tribolium* TERT (PDB ID: 3KYL) and RPA:ssDNA complex (PDB ID: 4GNX), respectively. The green dots indicate the region connecting the ssDNA from the two model structures. The N- and C-termini of the crystal structure of TEN are depicted by its amino acid numbers. TERT ring is in gray, active site catalytic triad residues are shown in red, and TEN is in cyan.

**Table S1. X-ray crystal and NMR structures used in the fitting of the cryo-EM maps of *Tetrahymena* telomerase holoenzyme**

| Subunit        | Domain   | Structure fitted in the cryo-EM maps                                     | Related PDB ID | Ref          |
|----------------|----------|--------------------------------------------------------------------------|----------------|--------------|
| TERT           | TEN      | <i>Tetrahymena</i> TERT TEN                                              | 2B2A           | (32)         |
|                | TRBD     | <i>Tetrahymena</i> TERT TRBD                                             | 2R4G           | (37)         |
|                | RT       | Homology model derived from <i>Tribolium</i> TERT                        | 3DU6           | (31)         |
|                | CTE      | Homology model derived from <i>Tribolium</i> TERT                        | 3DU6           | (31)         |
| TER            | SL4      | Model derived from <i>Tetrahymena</i> p65 xRRM2/TER S4 complex and L4    | 4ERD, 2M21     | (29, 33, 85) |
|                | SL2      | <i>Tetrahymena</i> TER SL2                                               | 2M22           | (29, 86)     |
|                | PK       | <i>Tetrahymena</i> TER PK                                                | 2N6Q           | this work    |
|                | Template | Homology model derived from <i>Tribolium</i> TERT/RNA-DNA hybrid complex | 3KYL           | (38)         |
|                | S1       | Ideal A-form RNA helix                                                   | --             | --           |
| p65            | xRRM2    | p65 xRRM2/TER S4 complex                                                 | 4ERD           | (33)         |
| p65            | La+RRM1  | hLa complex                                                              | 2VOP           | (33, 87)     |
| Teb1           | C        | <i>Tetrahymena</i> Teb1C                                                 | 3U50           | (50)         |
| Teb2           | N        | RPA32N in human RPA trimer                                               | 1L1O           | (51)         |
| Teb3           |          | RPA14 in human RPA trimer                                                | 1L1O           | (51)         |
| p75            | C        | RPA70C in human RPA trimer                                               | 1L1O           | (51)         |
| p45            | N        | RPA32N in human RPA trimer                                               | 1L1O           | (51)         |
| p19            |          | <i>Tetrahymena</i> p19                                                   | 5DFM           | this work    |
| p50            | N        | Human TPP1                                                               | 2I46           | (13)         |
| Telomere ssDNA |          | <i>Tribolium</i> TERT/RNA-DNA hybrid and fungal RPA/ssDNA complexes      | 3KYL, 4GNX     | (38, 88)     |

**Table S2A. Telomerase proteins identified from TERT-FZZ telomerase preparations by LC-MS/MS**

| TTHERM ID | Protein | MW (kDa) | Replicate 1           |                       |                    |                    | Replicate 2           |                       |                    |                    | Replicate 3           |                       |                    |                    |
|-----------|---------|----------|-----------------------|-----------------------|--------------------|--------------------|-----------------------|-----------------------|--------------------|--------------------|-----------------------|-----------------------|--------------------|--------------------|
|           |         |          | Uni. Pep <sup>a</sup> | Sig. Pep <sup>b</sup> | % Cov <sup>c</sup> | Score <sup>d</sup> | Uni. Pep <sup>a</sup> | Sig. Pep <sup>b</sup> | % Cov <sup>c</sup> | Score <sup>d</sup> | Uni. Pep <sup>a</sup> | Sig. Pep <sup>b</sup> | % Cov <sup>c</sup> | Score <sup>d</sup> |
| 00112560  | TERT    | 134.1    | 30                    | 22                    | 22                 | 393                | 84                    | 70                    | 53                 | 2440               | 37                    | 22                    | 30                 | 370                |
| 000318539 | p65     | 64.6     | 22                    | 17                    | 41                 | 300                | 49                    | 42                    | 62                 | 1447               | 36                    | 20                    | 50                 | 358                |
| 01049190  | p50     | 50.3     | 14                    | 8                     | 29                 | 276                | 27                    | 26                    | 45                 | 2539               | 11                    | 7                     | 29                 | 147                |
| 0059040   | p75     | 74.3     | 21                    | 10                    | 24                 | 150                | 42                    | 31                    | 50                 | 955                | 28                    | 15                    | 40                 | 437                |
| 0083360   | p45     | 43.8     | 17                    | 11                    | 34                 | 201                | 30                    | 27                    | 59                 | 1475               | 14                    | 7                     | 33                 | 198                |
| 00658760  | p19     | 19.5     | 7                     | 3                     | 38                 | 88                 | 9                     | 8                     | 50                 | 223                | 1                     | 1                     | 8                  | 39                 |
| 00218760  | Teb1    | 82.6     | 12                    | 7                     | 15                 | 148                | 18                    | 15                    | 21                 | 1479               | 5                     | 2                     | 8                  | 251                |
| 00113129  | Teb2    | 31.1     | 9                     | 7                     | 42                 | 414                | 15                    | 13                    | 49                 | 858                | 8                     | 5                     | 35                 | 334                |
| 00439320  | Teb3    | 14.0     | 8                     | 7                     | 44                 | 406                | 9                     | 8                     | 51                 | 507                | 5                     | 3                     | 40                 | 409                |

**Table S2B. Telomerase proteins identified from ZZF-p50 telomerase preparations by LC-MS/MS**

| TTHERM ID | Protein | MW (kDa) | Replicate 1           |                       |                    |                    | Replicate 2           |                       |                    |                    |
|-----------|---------|----------|-----------------------|-----------------------|--------------------|--------------------|-----------------------|-----------------------|--------------------|--------------------|
|           |         |          | Uni. Pep <sup>a</sup> | Sig. Pep <sup>b</sup> | % Cov <sup>c</sup> | Score <sup>d</sup> | Uni. Pep <sup>a</sup> | Sig. Pep <sup>b</sup> | % Cov <sup>c</sup> | Score <sup>d</sup> |
| 00112560  | TERT    | 134.1    | 15                    | 3                     | 12                 | 40                 | 40                    | 33                    | 31                 | 616                |
| 000318539 | p65     | 64.6     | 7                     | 3                     | 12                 | 74                 | 36                    | 29                    | 47                 | 828                |
| 01049190  | p50     | 50.3     | 16                    | 8                     | 38                 | 118                | 30                    | 24                    | 60                 | 1218               |
| 0059040   | p75     | 74.3     | 24                    | 15                    | 33                 | 256                | 25                    | 19                    | 37                 | 334                |
| 0083360   | p45     | 43.8     | 12                    | 6                     | 27                 | 128                | 20                    | 15                    | 50                 | 746                |
| 00658760  | p19     | 19.5     | 7                     | 4                     | 33                 | 79                 | 9                     | 7                     | 44                 | 241                |
| 00218760  | Teb1    | 82.6     | 0                     | 0                     | -                  | -                  | 0                     | 0                     | -                  | -                  |
| 00113129  | Teb2    | 31.1     | 0                     | 0                     | -                  | -                  | 1                     | 1                     | -                  | -                  |
| 00439320  | Teb3    | 14.0     | 0                     | 0                     | -                  | -                  | 0                     | 0                     | -                  | -                  |

<sup>a</sup>Number of unique peptide sequences identified at  $\leq 10$  ppm mass accuracy

<sup>b</sup>Number of unique peptide sequences identified with E-value  $< 0.05$  ( $>95\%$  confidence that the match was not random)

<sup>c</sup>Percentage of theoretical sequence covered by identified peptides

<sup>d</sup>Mascot score employing all peptides with E-value  $< 0.05$



**Table S3. X-Ray Data Collection and Refinement Statistics**

|                                                            | MBP-p19                    | P45C                       |
|------------------------------------------------------------|----------------------------|----------------------------|
| <b>Data Collection</b>                                     |                            |                            |
| Space group                                                | P2 <sub>1</sub> 3          | F222                       |
| <i>Unit cell dimensions</i>                                |                            |                            |
| a, b, c (Å)                                                | 150.60, 150.60, 150.60     | 88.03, 124.62, 173.77      |
| α, β, γ (°)                                                | 90.00, 90.00, 90.00        | 90.00, 90.00, 90.00        |
| Reflections observed                                       | 993,498                    | 101,012                    |
| Unique reflections                                         | 50,601                     | 18,884                     |
| Multiplicity                                               | 19.6                       | 5.3                        |
| Wavelength (Å)                                             | 0.9795                     | 0.9791                     |
| Resolution (Å)                                             | 2.30                       | 2.38                       |
| Highest Resolution Shell (Å)                               | 2.30 – 2.36                | 2.38 – 2.45                |
| R <sub>sym</sub> (%) <sup>a</sup>                          | 11.9 (103.3)               | 6.4 (72.8)                 |
| R <sub>p.i.m.</sub> (%) <sup>b</sup>                       | 3.9 (30.4)                 | 3.3 (30.7)                 |
| CC(1/2)                                                    | 99.9 (90.0)                | 99.9 (86.7)                |
| I/σ                                                        | 19.4 (3.4)                 | 14.1 (2.5)                 |
| Completeness (%)                                           | 99.9 (98.7)                | 97.8 (78.6)                |
| Wilson B value (Å <sup>2</sup> )                           | 40.16                      | 53.10                      |
| <b>Refinement</b>                                          |                            |                            |
| Resolution (Å)                                             | 86.89 – 2.30               | 86.89 – 2.38               |
| Resolution (Å) (last shell)                                | 2.30 – 2.33                | 2.38 – 2.45                |
| Reflections used                                           | 50,569                     | 18,334                     |
| R <sub>work</sub> (%) / R <sub>free</sub> (%) <sup>c</sup> | 17.5 / 22.6; (22.7 / 31.4) | 20.7 / 26.4; (32.9 / 41.5) |
| Protein molecules in Asymmetric Unit                       | 2                          | 2                          |
| <i>Number of non-H atoms</i>                               |                            |                            |
| Protein                                                    | 7784                       | 2730                       |
| Non-protein                                                | 207                        | 6                          |
| <i>RMS Deviations</i>                                      |                            |                            |
| Bond lengths (Å)                                           | 0.008                      | 0.008                      |
| Bond angles (°)                                            | 1.14                       | 1.01                       |
| <i>Average B-factor (Å<sup>2</sup>)</i>                    |                            |                            |
| Protein atoms                                              | 45.2                       | 62.8                       |
| Non-protein atoms                                          | 56.8                       | 50.4                       |
| <i>Ramachandran plot regions<sup>c</sup></i>               |                            |                            |
| Favored                                                    | 97.2                       | 98.19                      |
| Allowed                                                    | 2.8                        | 1.81                       |
| Outliers                                                   | 0.00                       | 0.00                       |

Highest resolution shell shown in parenthesis

$$^a R_{\text{sym}} = 100 \times \frac{\sum (I - I(\text{mean}))^2}{\sum I^2}$$

$$^b R_{\text{p.i.m.}} = 100 \times \frac{\sum \sqrt{1/(N-1)} \sum (I - I(\text{mean}))}{\sum I^2}$$

where *I* is the observed intensity of the reflection HKL and the sum is taken over all reflections HKL and *N* is the redundancy

$$^c R_{\text{factor}} = 100 \times \frac{\sum ||F_{\text{obs}}| - |F_{\text{calc}}||}{\sum |F_{\text{obs}}|}$$

*F*<sub>calc</sub> and *F*<sub>obs</sub> are the calculated and observed structure factor amplitudes, respectively. *R*<sub>work</sub> refers to the *R*<sub>factor</sub> for the data utilized in the refinement and *R*<sub>free</sub> refers to the *R*<sub>factor</sub> for 5% of the reflections randomly chosen that were excluded from the refinement

<sup>c</sup>Percentage of residues in Ramachandran plot regions were determined using Molprobitry (Chen et.al 2010).

**Table S4. NMR restraints and structure statistics for *Tetrahymena* TER pseudoknot**

| Parameter                                     | Value              |
|-----------------------------------------------|--------------------|
| <b>NMR distance and dihedral restraints</b>   |                    |
| Distance restraints                           |                    |
| Total NOEs                                    | 414                |
| Intraresidue NOEs                             | 103                |
| Interresidue NOEs                             | 311                |
| Sequential ( $ i-j  = 1$ )                    | 176                |
| Long range ( $ i-j  > 1$ )                    | 135                |
| Hydrogen bond restraints*                     | 82                 |
| Total dihedral angle restraints               | 171                |
| Sugar pucker                                  | 140                |
| $\chi$                                        | 31                 |
| RDCs                                          | 79                 |
| <b>Structure statistics</b>                   |                    |
| Violations (mean $\pm$ SD)                    |                    |
| Distance constraints ( $\text{\AA}$ )         | 0.054 $\pm$ .001   |
| Dihedral angle constraints ( $^\circ$ )       | 0.020 $\pm$ .002   |
| Maximum dihedral angle violation ( $^\circ$ ) | 2.03               |
| Maximum distance violation ( $^\circ$ )       | 0.29               |
| Deviations from idealized geometry            |                    |
| Bond lengths ( $\text{\AA}$ )                 | 0.0057 $\pm$ .0001 |
| Bond angles ( $^\circ$ )                      | 0.95 $\pm$ .02     |
| Impropers ( $^\circ$ )                        | 0.61 $\pm$ .04     |
| Average pairwise rmsd ( $\text{\AA}$ ) **     |                    |
| Heavy                                         | 0.83 $\pm$ 0.23    |
| Backbone                                      | 0.84 $\pm$ 0.24    |

\* Two hydrogen bond restraints were used for each hydrogen bond.

\*\* Pairwise RMSD was calculated for the lowest 10 energy structures.

## References and Notes

1. E. H. Blackburn, C. W. Greider, J. W. Szostak, Telomeres and telomerase: The path from maize, *Tetrahymena* and yeast to human cancer and aging. *Nat. Med.* **12**, 1133–1138 (2006). [Medline doi:10.1038/nm1006-1133](#)
2. E. H. Blackburn, K. Collins, Telomerase: An RNP enzyme synthesizes DNA. *Cold Spring Harbor Perspect. Biol.* **3**, a003558 (2011). [Medline doi:10.1101/cshperspect.a003558](#)
3. M. Armanios, E. H. Blackburn, The telomere syndromes. *Nat. Rev. Genet.* **13**, 693–704 (2012). [Medline doi:10.1038/nrg3246](#)
4. B. Bernardes de Jesus, M. A. Blasco, Telomerase at the intersection of cancer and aging. *Trends Genet.* **29**, 513–520 (2013). [Medline doi:10.1016/j.tig.2013.06.007](#)
5. S. E. Artandi, R. A. DePinho, Telomeres and telomerase in cancer. *Carcinogenesis* **31**, 9–18 (2010). [Medline doi:10.1093/carcin/bgp268](#)
6. J. Nandakumar, T. R. Cech, Finding the end: Recruitment of telomerase to telomeres. *Nat. Rev. Mol. Cell Biol.* **14**, 69–82 (2013). [Medline doi:10.1038/nrm3505](#)
7. J. A. Stewart, M. F. Chaiken, F. Wang, C. M. Price, Maintaining the end: Roles of telomere proteins in end-protection, telomere replication and length regulation. *Mutat. Res.* **730**, 12–19 (2012). [Medline doi:10.1016/j.mrfmmm.2011.08.011](#)
8. L. Y. Chen, J. Lingner, CST for the grand finale of telomere replication. *Nucleus* **4**, 277–282 (2013). [Medline doi:10.4161/nucl.25701](#)
9. F. L. Zhong, L. F. Batista, A. Freund, M. F. Pech, A. S. Venteicher, S. E. Artandi, TPP1 OB-fold domain controls telomere maintenance by recruiting telomerase to chromosome ends. *Cell* **150**, 481–494 (2012). [Medline doi:10.1016/j.cell.2012.07.012](#)
10. A. N. Sexton, D. T. Youmans, K. Collins, Specificity requirements for human telomere protein interaction with telomerase holoenzyme. *J. Biol. Chem.* **287**, 34455–34464 (2012). [Medline doi:10.1074/jbc.M112.394767](#)
11. J. Nandakumar, C. F. Bell, I. Weidenfeld, A. J. Zaugg, L. A. Leinwand, T. R. Cech, The TEL patch of telomere protein TPP1 mediates telomerase recruitment and processivity. *Nature* **492**, 285–289 (2012). [Medline doi:10.1038/nature11648](#)
12. H. Xin, D. Liu, M. Wan, A. Safari, H. Kim, W. Sun, M. S. O'Connor, Z. Songyang, TPP1 is a homologue of ciliate TEBP- $\beta$  and interacts with POT1 to recruit telomerase. *Nature* **445**, 559–562 (2007). [Medline doi:10.1038/nature05469](#)
13. F. Wang, E. R. Podell, A. J. Zaugg, Y. Yang, P. Baciu, T. R. Cech, M. Lei, The POT1-TPP1 telomere complex is a telomerase processivity factor. *Nature* **445**, 506–510 (2007). [Medline doi:10.1038/nature05454](#)
14. T. Rao, J. W. Lubin, G. S. Armstrong, T. M. Tucey, V. Lundblad, D. S. Wuttke, Structure of Est3 reveals a bimodal surface with differential roles in telomere replication. *Proc. Natl. Acad. Sci. U.S.A.* **111**, 214–218 (2014). [Medline doi:10.1073/pnas.1316453111](#)
15. J. M. Talley, D. C. DeZwaan, L. D. Maness, B. C. Freeman, K. L. Friedman, Stimulation of yeast telomerase activity by the ever shorter telomere 3 (Est3) subunit is dependent on

- direct interaction with the catalytic protein Est2. *J. Biol. Chem.* **286**, 26431–26439 (2011). [Medline doi:10.1074/jbc.M111.228635](#)
16. A. Prakash, G. E. Borgstahl, The structure and function of replication protein A in DNA replication. *Subcell. Biochem.* **62**, 171–196 (2012). [Medline doi:10.1007/978-94-007-4572-8\\_10](#)
  17. K. A. Lewis, D. S. Wuttke, Telomerase and telomere-associated proteins: Structural insights into mechanism and evolution. *Structure* **20**, 28–39 (2012). [Medline doi:10.1016/j.str.2011.10.017](#)
  18. L. Y. Chen, S. Redon, J. Lingner, The human CST complex is a terminator of telomerase activity. *Nature* **488**, 540–544 (2012). [Medline doi:10.1038/nature11269](#)
  19. C. M. Price, K. A. Boltz, M. F. Chaiken, J. A. Stewart, M. A. Beilstein, D. E. Shippen, Evolution of CST function in telomere maintenance. *Cell Cycle* **9**, 3157–3165 (2010). [Medline doi:10.4161/cc.9.16.12547](#)
  20. P. Wu, H. Takai, T. de Lange, Telomeric 3' overhangs derive from resection by Exo1 and Apollo and fill-in by POT1b-associated CST. *Cell* **150**, 39–52 (2012). [Medline doi:10.1016/j.cell.2012.05.026](#)
  21. F. Wang, J. A. Stewart, C. Kasbek, Y. Zhao, W. E. Wright, C. M. Price, Human CST has independent functions during telomere duplex replication and C-strand fill-in. *Cell Reports* **2**, 1096–1103 (2012). [Medline doi:10.1016/j.celrep.2012.10.007](#)
  22. N. F. Lue, E. Y. Yu, M. Lei, A popular engagement at the ends. *Nat. Struct. Mol. Biol.* **20**, 10–12 (2013). [Medline doi:10.1038/nsmb.2483](#)
  23. T. M. Tucey, V. Lundblad, Regulated assembly and disassembly of the yeast telomerase quaternary complex. *Genes Dev.* **28**, 2077–2089 (2014). [Medline doi:10.1101/gad.246256.114](#)
  24. R. J. Wellinger, V. A. Zakian, Everything you ever wanted to know about *Saccharomyces cerevisiae* telomeres: Beginning to end. *Genetics* **191**, 1073–1105 (2012). [Medline doi:10.1534/genetics.111.137851](#)
  25. E. D. Egan, K. Collins, Biogenesis of telomerase ribonucleoproteins. *RNA* **18**, 1747–1759 (2012). [Medline doi:10.1261/rna.034629.112](#)
  26. J. D. Podlevsky, J. J. Chen, It all comes together at the ends: Telomerase structure, function, and biogenesis. *Mutat. Res.* **730**, 3–11 (2012). [Medline doi:10.1016/j.mrfmmm.2011.11.002](#)
  27. H. E. Upton, K. Hong, K. Collins, Direct single-stranded DNA binding by Teb1 mediates the recruitment of *Tetrahymena thermophila* telomerase to telomeres. *Mol. Cell. Biol.* **34**, 4200–4212 (2014). [Medline doi:10.1128/MCB.01030-14](#)
  28. B. Min, K. Collins, An RPA-related sequence-specific DNA-binding subunit of telomerase holoenzyme is required for elongation processivity and telomere maintenance. *Mol. Cell* **36**, 609–619 (2009). [Medline doi:10.1016/j.molcel.2009.09.041](#)

29. J. Jiang, E. J. Miracco, K. Hong, B. Eckert, H. Chan, D. D. Cash, B. Min, Z. H. Zhou, K. Collins, J. Feigon, The architecture of *Tetrahymena* telomerase holoenzyme. *Nature* **496**, 187–192 (2013). [Medline doi:10.1038/nature12062](#)
30. C. A. Theimer, J. Feigon, Structure and function of telomerase RNA. *Curr. Opin. Struct. Biol.* **16**, 307–318 (2006). [Medline doi:10.1016/j.sbi.2006.05.005](#)
31. A. J. Gillis, A. P. Schuller, E. Skordalakes, Structure of the *Tribolium castaneum* telomerase catalytic subunit TERT. *Nature* **455**, 633–637 (2008). [Medline doi:10.1038/nature07283](#)
32. S. A. Jacobs, E. R. Podell, T. R. Cech, Crystal structure of the essential N-terminal domain of telomerase reverse transcriptase. *Nat. Struct. Mol. Biol.* **13**, 218–225 (2006). [Medline doi:10.1038/nsmb1054](#)
33. M. Singh, Z. Wang, B. K. Koo, A. Patel, D. Cascio, K. Collins, J. Feigon, Structural basis for telomerase RNA recognition and RNP assembly by the holoenzyme La family protein p65. *Mol. Cell* **47**, 16–26 (2012). [Medline doi:10.1016/j.molcel.2012.05.018](#)
34. M. D. Stone, M. Mihalusova, C. M. O’connor, R. Prathapam, K. Collins, X. Zhuang, Stepwise protein-mediated RNA folding directs assembly of telomerase ribonucleoprotein. *Nature* **446**, 458–461 (2007). [Medline doi:10.1038/nature05600](#)
35. N. K. Jacob, R. Lescasse, B. R. Linger, C. M. Price, *Tetrahymena* POT1a regulates telomere length and prevents activation of a cell cycle checkpoint. *Mol. Cell. Biol.* **27**, 1592–1601 (2007). [Medline doi:10.1128/MCB.01975-06](#)
36. K. Hong, H. Upton, E. J. Miracco, J. Jiang, Z. H. Zhou, J. Feigon, K. Collins, *Tetrahymena* telomerase holoenzyme assembly, activation, and inhibition by domains of the p50 central hub. *Mol. Cell. Biol.* **33**, 3962–3971 (2013). [Medline doi:10.1128/MCB.00792-13](#)
37. S. Rouda, E. Skordalakes, Structure of the RNA-binding domain of telomerase: Implications for RNA recognition and binding. *Structure* **15**, 1403–1412 (2007). [Medline doi:10.1016/j.str.2007.09.007](#)
38. M. Mitchell, A. Gillis, M. Futahashi, H. Fujiwara, E. Skordalakes, Structural basis for telomerase catalytic subunit TERT binding to RNA template and telomeric DNA. *Nat. Struct. Mol. Biol.* **17**, 513–518 (2010). [Medline doi:10.1038/nsmb.1777](#)
39. N. F. Lue, Y. C. Lin, I. S. Mian, A conserved telomerase motif within the catalytic domain of telomerase reverse transcriptase is specifically required for repeat addition processivity. *Mol. Cell. Biol.* **23**, 8440–8449 (2003). [Medline doi:10.1128/MCB.23.23.8440-8449.2003](#)
40. M. Xie, J. D. Podlevsky, X. Qi, C. J. Bley, J. J. Chen, A novel motif in telomerase reverse transcriptase regulates telomere repeat addition rate and processivity. *Nucleic Acids Res.* **38**, 1982–1996 (2010). [Medline doi:10.1093/nar/gkp1198](#)
41. R. A. Wu, K. Collins, Human telomerase specialization for repeat synthesis by unique handling of primer-template duplex. *EMBO J.* **33**, 921–935 (2014). [Medline doi:10.1002/emboj.201387205](#)
42. B. Eckert, K. Collins, Roles of telomerase reverse transcriptase N-terminal domain in assembly and activity of *Tetrahymena* telomerase holoenzyme. *J. Biol. Chem.* **287**, 12805–12814 (2012). [Medline doi:10.1074/jbc.M112.339853](#)

43. F. Qiao, T. R. Cech, Triple-helix structure in telomerase RNA contributes to catalysis. *Nat. Struct. Mol. Biol.* **15**, 634–640 (2008). [Medline doi:10.1038/nsmb.1420](#)
44. D. D. Cash, O. Cohen-Zontag, N. K. Kim, K. Shefer, Y. Brown, N. B. Ulyanov, Y. Tzfati, J. Feigon, Pyrimidine motif triple helix in the *Kluyveromyces lactis* telomerase RNA pseudoknot is essential for function in vivo. *Proc. Natl. Acad. Sci. U.S.A.* **110**, 10970–10975 (2013). [Medline doi:10.1073/pnas.1309590110](#)
45. C. A. Theimer, C. A. Blois, J. Feigon, Structure of the human telomerase RNA pseudoknot reveals conserved tertiary interactions essential for function. *Mol. Cell* **17**, 671–682 (2005). [Medline doi:10.1016/j.molcel.2005.01.017](#)
46. M. Mihalusova, J. Y. Wu, X. Zhuang, Functional importance of telomerase pseudoknot revealed by single-molecule analysis. *Proc. Natl. Acad. Sci. U.S.A.* **108**, 20339–20344 (2011). [Medline doi:10.1073/pnas.1017686108](#)
47. C. M. O'Connor, K. Collins, A novel RNA binding domain in *Tetrahymena* telomerase p65 initiates hierarchical assembly of telomerase holoenzyme. *Mol. Cell. Biol.* **26**, 2029–2036 (2006). [Medline doi:10.1128/MCB.26.6.2029-2036.2006](#)
48. A. J. Berman, A. R. Gooding, T. R. Cech, *Tetrahymena* telomerase protein p65 induces conformational changes throughout telomerase RNA (TER) and rescues telomerase reverse transcriptase and TER assembly mutants. *Mol. Cell. Biol.* **30**, 4965–4976 (2010). [Medline doi:10.1128/MCB.00827-10](#)
49. X. Qi, M. Xie, A. F. Brown, C. J. Bley, J. D. Podlevsky, J. J. Chen, RNA/DNA hybrid binding affinity determines telomerase template-translocation efficiency. *EMBO J.* **31**, 150–161 (2012). [Medline doi:10.1038/emboj.2011.363](#)
50. Z. Zeng, B. Min, J. Huang, K. Hong, Y. Yang, K. Collins, M. Lei, Structural basis for *Tetrahymena* telomerase processivity factor Teb1 binding to single-stranded telomeric-repeat DNA. *Proc. Natl. Acad. Sci. U.S.A.* **108**, 20357–20361 (2011). [Medline doi:10.1073/pnas.1113624108](#)
51. E. Bochkareva, S. Korolev, S. P. Lees-Miller, A. Bochkarev, Structure of the RPA trimerization core and its role in the multistep DNA-binding mechanism of RPA. *EMBO J.* **21**, 1855–1863 (2002). [Medline doi:10.1093/emboj/21.7.1855](#)
52. S. F. Altschul, T. L. Madden, A. A. Schäffer, J. Zhang, Z. Zhang, W. Miller, D. J. Lipman, Gapped BLAST and PSI-BLAST: A new generation of protein database search programs. *Nucleic Acids Res.* **25**, 3389–3402 (1997). [Medline doi:10.1093/nar/25.17.3389](#)
53. C. Cole, J. D. Barber, G. J. Barton, The Jpred 3 secondary structure prediction server. *Nucleic Acids Res.* **36** (suppl. 2), W197–W201 (2008). [Medline doi:10.1093/nar/gkn238](#)
54. B. Min, K. Collins, Multiple mechanisms for elongation processivity within the reconstituted *Tetrahymena* telomerase holoenzyme. *J. Biol. Chem.* **285**, 16434–16443 (2010). [Medline doi:10.1074/jbc.M110.119172](#)
55. J. Xiong, X. Lu, Z. Zhou, Y. Chang, D. Yuan, M. Tian, Z. Zhou, L. Wang, C. Fu, E. Orias, W. Miao, Transcriptome analysis of the model protozoan, *Tetrahymena thermophila*, using deep RNA sequencing. *PLOS ONE* **7**, e30630 (2012). [Medline doi:10.1371/journal.pone.0030630](#)

56. A. N. Sexton, S. G. Regalado, C. S. Lai, G. J. Cost, C. M. O'Neil, F. D. Urnov, P. D. Gregory, R. Jaenisch, K. Collins, D. Hockemeyer, Genetic and molecular identification of three human TPP1 functions in telomerase action: Recruitment, activation, and homeostasis set point regulation. *Genes Dev.* **28**, 1885–1899 (2014). [Medline](#)
57. J. C. Schmidt, A. B. Dalby, T. R. Cech, Identification of human TERT elements necessary for telomerase recruitment to telomeres. *eLife* **3**, e03563 (2014). [doi:10.7554/eLife.03563](https://doi.org/10.7554/eLife.03563)
58. J. Sun, E. Y. Yu, Y. Yang, L. A. Confer, S. H. Sun, K. Wan, N. F. Lue, M. Lei, Stn1-Ten1 is an Rpa2-Rpa3-like complex at telomeres. *Genes Dev.* **23**, 2900–2914 (2009). [Medline](#) [doi:10.1101/gad.1851909](https://doi.org/10.1101/gad.1851909)
59. C. Bryan, C. Rice, M. Harkisheimer, D. C. Schultz, E. Skordalakes, Structure of the human telomeric Stn1-Ten1 capping complex. *PLOS ONE* **8**, e66756 (2013). [Medline](#) [doi:10.1371/journal.pone.0066756](https://doi.org/10.1371/journal.pone.0066756)
60. B. Vester, J. Wengel, LNA (locked nucleic acid): High-affinity targeting of complementary RNA and DNA. *Biochemistry* **43**, 13233–13241 (2004). [Medline](#) [doi:10.1021/bi0485732](https://doi.org/10.1021/bi0485732)
61. J. Huang, A. F. Brown, J. Wu, J. Xue, C. J. Bley, D. P. Rand, L. Wu, R. Zhang, J. J. Chen, M. Lei, Structural basis for protein-RNA recognition in telomerase. *Nat. Struct. Mol. Biol.* **21**, 507–512 (2014). [Medline](#) [doi:10.1038/nsmb.2819](https://doi.org/10.1038/nsmb.2819)
62. J. L. Chen, K. K. Opperman, C. W. Greider, A critical stem-loop structure in the CR4-CR5 domain of mammalian telomerase RNA. *Nucleic Acids Res.* **30**, 592–597 (2002). [Medline](#) [doi:10.1093/nar/30.2.592](https://doi.org/10.1093/nar/30.2.592)
63. C. J. Bley, X. Qi, D. P. Rand, C. R. Borges, R. W. Nelson, J. J. Chen, RNA-protein binding interface in the telomerase ribonucleoprotein. *Proc. Natl. Acad. Sci. U.S.A.* **108**, 20333–20338 (2011). [Medline](#) [doi:10.1073/pnas.1100270108](https://doi.org/10.1073/pnas.1100270108)
64. A. J. Zaugg, E. R. Podell, T. R. Cech, Mutation in TERT separates processivity from anchor-site function. *Nat. Struct. Mol. Biol.* **15**, 870–872 (2008). [Medline](#) [doi:10.1038/nsmb.1462](https://doi.org/10.1038/nsmb.1462)
65. B. R. Linger, G. B. Morin, C. M. Price, The Pot1a-associated proteins Tpt1 and Pat1 coordinate telomere protection and length regulation in *Tetrahymena*. *Mol. Biol. Cell* **22**, 4161–4170 (2011). [Medline](#) [doi:10.1091/mbc.E11-06-0551](https://doi.org/10.1091/mbc.E11-06-0551)
66. C. Suloway, J. Pulokas, D. Fellmann, A. Cheng, F. Guerra, J. Quispe, S. Stagg, C. S. Potter, B. Carragher, Automated molecular microscopy: The new Legimon system. *J. Struct. Biol.* **151**, 41–60 (2005). [Medline](#) [doi:10.1016/j.jsb.2005.03.010](https://doi.org/10.1016/j.jsb.2005.03.010)
67. X. Li, P. Mooney, S. Zheng, C. R. Booth, M. B. Braunfeld, S. Gubbens, D. A. Agard, Y. Cheng, Electron counting and beam-induced motion correction enable near-atomic-resolution single-particle cryo-EM. *Nat. Methods* **10**, 584–590 (2013). [Medline](#) [doi:10.1038/nmeth.2472](https://doi.org/10.1038/nmeth.2472)
68. J. A. Mindell, N. Grigorieff, Accurate determination of local defocus and specimen tilt in electron microscopy. *J. Struct. Biol.* **142**, 334–347 (2003). [Medline](#) [doi:10.1016/S1047-8477\(03\)00069-8](https://doi.org/10.1016/S1047-8477(03)00069-8)
69. J. B. Heymann, D. M. Belnap, Bsoft: Image processing and molecular modeling for electron microscopy. *J. Struct. Biol.* **157**, 3–18 (2007). [Medline](#) [doi:10.1016/j.jsb.2006.06.006](https://doi.org/10.1016/j.jsb.2006.06.006)

70. N. R. Voss, C. K. Yoshioka, M. Radermacher, C. S. Potter, B. Carragher, DoG Picker and TiltPicker: Software tools to facilitate particle selection in single particle electron microscopy. *J. Struct. Biol.* **166**, 205–213 (2009). [Medline](#) [doi:10.1016/j.jsb.2009.01.004](https://doi.org/10.1016/j.jsb.2009.01.004)
71. S. J. Ludtke, P. R. Baldwin, W. Chiu, EMAN: Semiautomated software for high-resolution single-particle reconstructions. *J. Struct. Biol.* **128**, 82–97 (1999). [Medline](#) [doi:10.1006/jsbi.1999.4174](https://doi.org/10.1006/jsbi.1999.4174)
72. S. H. Scheres, RELION: Implementation of a Bayesian approach to cryo-EM structure determination. *J. Struct. Biol.* **180**, 519–530 (2012). [Medline](#) [doi:10.1016/j.jsb.2012.09.006](https://doi.org/10.1016/j.jsb.2012.09.006)
73. E. F. Pettersen, T. D. Goddard, C. C. Huang, G. S. Couch, D. M. Greenblatt, E. C. Meng, T. E. Ferrin, UCSF Chimera—A visualization system for exploratory research and analysis. *J. Comput. Chem.* **25**, 1605–1612 (2004). [Medline](#) [doi:10.1002/jcc.20084](https://doi.org/10.1002/jcc.20084)
74. A. Kucukelbir, F. J. Sigworth, H. D. Tagare, Quantifying the local resolution of cryo-EM density maps. *Nat. Methods* **11**, 63–65 (2014). [Medline](#) [doi:10.1038/nmeth.2727](https://doi.org/10.1038/nmeth.2727)
75. P. Emsley, K. Cowtan, *Coot*: Model-building tools for molecular graphics. *Acta Crystallogr. D* **60**, 2126–2132 (2004). [Medline](#) [doi:10.1107/S09074444904019158](https://doi.org/10.1107/S09074444904019158)
76. P. Chacón, W. Wriggers, Multi-resolution contour-based fitting of macromolecular structures. *J. Mol. Biol.* **317**, 375–384 (2002). [Medline](#) [doi:10.1006/jmbi.2002.5438](https://doi.org/10.1006/jmbi.2002.5438)
77. The PyMOL Molecular Graphics System, Version 1.7.4, Schrödinger, LLC.
78. A. F. Moon, G. A. Mueller, X. Zhong, L. C. Pedersen, A synergistic approach to protein crystallization: Combination of a fixed-arm carrier with surface entropy reduction. *Protein Sci.* **19**, 901–913 (2010). [Medline](#)
79. K. L. Witkin, K. Collins, Holoenzyme proteins required for the physiological assembly and activity of telomerase. *Genes Dev.* **18**, 1107–1118 (2004). [Medline](#) [doi:10.1101/gad.1201704](https://doi.org/10.1101/gad.1201704)
80. W. Kabsch, Integration, scaling, space-group assignment and post-refinement. *Acta Crystallogr. D* **66**, 133–144 (2010). [Medline](#) [doi:10.1107/S09074444909047374](https://doi.org/10.1107/S09074444909047374)
81. A. J. McCoy, R. W. Grosse-Kunstleve, P. D. Adams, M. D. Winn, L. C. Storoni, R. J. Read, *Phaser* crystallographic software. *J. Appl. Cryst.* **40**, 658–674 (2007). [Medline](#) [doi:10.1107/S0021889807021206](https://doi.org/10.1107/S0021889807021206)
82. P. V. Afonine, R. W. Grosse-Kunstleve, N. Echols, J. J. Headd, N. W. Moriarty, M. Mustyakimov, T. C. Terwilliger, A. Urzhumtsev, P. H. Zwart, P. D. Adams, Towards automated crystallographic structure refinement with *phenix.refine*. *Acta Crystallogr. D* **68**, 352–367 (2012). [Medline](#) [doi:10.1107/S09074444912001308](https://doi.org/10.1107/S09074444912001308)
83. N. K. Kim, Q. Zhang, J. Zhou, C. A. Theimer, R. D. Peterson, J. Feigon, Solution structure and dynamics of the wild-type pseudoknot of human telomerase RNA. *J. Mol. Biol.* **384**, 1249–1261 (2008). [Medline](#) [doi:10.1016/j.jmb.2008.10.005](https://doi.org/10.1016/j.jmb.2008.10.005)
84. J. Erde, R. R. Loo, J. A. Loo, Enhanced FASP (eFASP) to increase proteome coverage and sample recovery for quantitative proteomic experiments. *J. Proteome Res.* **13**, 1885–1895 (2014). [Medline](#) [doi:10.1021/pr4010019](https://doi.org/10.1021/pr4010019)



85. R. J. Richards, H. Wu, L. Trantirek, C. M. O'Connor, K. Collins, J. Feigon, Structural study of elements of *Tetrahymena* telomerase RNA stem-loop IV domain important for function. *RNA* **12**, 1475–1485 (2006). [Medline doi:10.1261/rna.112306](#)
86. R. J. Richards, C. A. Theimer, L. D. Finger, J. Feigon, Structure of the *Tetrahymena thermophila* telomerase RNA helix II template boundary element. *Nucleic Acids Res.* **34**, 816–825 (2006). [Medline doi:10.1093/nar/gkj481](#)
87. O. Kotik-Kogan, E. R. Valentine, D. Sanfelice, M. R. Conte, S. Curry, Structural analysis reveals conformational plasticity in the recognition of RNA 3' ends by the human La protein. *Structure* **16**, 852–862 (2008). [Medline doi:10.1016/j.str.2008.02.021](#)
88. J. Fan, N. P. Pavletich, Structure and conformational change of a replication protein A heterotrimer bound to ssDNA. *Genes Dev.* **26**, 2337–2347 (2012). [Medline doi:10.1101/gad.194787.112](#)
